# Supplementary material for: Ancestry & molecular evolutionary analyses of heat shock protein 47 kDa (HSP47/SERPINH1)
Source: PubMed Central journal article supplement (PMC5583329; doi:10.1038/s41598-017-10740-0), 2017-09-04
Supplement: 41598_2017_10740_MOESM1_ESM.pdf [file 41598_2017_10740_MOESM1_ESM.pdf]

# **Ancestry & molecular evolutionary analyses of heat shock protein 47 kDa (HSP47/SERPINH1)**

**Abhishek Kumar<sup>1,2\*</sup> Anita Bhandari<sup>3</sup>, Sandeep J. Sarde<sup>1,4</sup> & Chandan Goswami<sup>5</sup>**

<sup>1</sup>Department of Genetics & Molecular Biology in Botany, Institute of Botany, Christian-Albrechts-University at Kiel, Germany

<sup>2</sup>Current Address - Division of Molecular Genetic Epidemiology German Cancer Research Center, Heidelberg, Germany

<sup>3</sup>Institute for Cardiogenetics, University of Lübeck, Lübeck, Germany

<sup>4</sup>Laboratory of Entomology, Department of Plant Sciences, Wageningen University & Research, Wageningen, Netherland

<sup>5</sup>National Institute of Science Education and Research, Bhubaneswar, Orissa, India

\*Email:

AK –[abhishek.abhishekkumar@gmail.com](mailto:abhishek.abhishekkumar@gmail.com)

**Fig S1. Detailed phylogenetic tree of HSP47 proteins reveals three sets of HSP47 in ray-finned fishes.** This tree was obtained using MEGA7 with maximum likelihood method using bootstrap of 1000. Ame - *Ailurogobius melanoleuca*; Apl - *Anas platyrhynchos*; Aca - *Anolis carolinensis*; Ame - *Astyanax mexicanus*; Bta - *Bos taurus*; Cja - *Callithrix jacchus*; Cfa - *Canis lupus familiaris*; Cpo - *Cavia porcellus*; Csa - *Chlorocebus sabaeus*; Dre - *Danio rerio*; Dno - *Dasylops novemcinctus*; Dor - *Dipodomys ordii*; Ete - *Echinops telfairi*; Eca - *Equus caballus*; Eeu - *Erinaceus europaeus*; Fca - *Felis catus*; Fal - *Ficedula albicollis*; Gmo - *Gadus morhua*; Gga - *Gallus gallus*; Gac - *Gasterosteus aculeatus*; Ggo - *Gorilla gorilla*; Hsa - *Homo sapiens*; Itr - *Ictidomys tridecemlineatus*; Lch - *Latimeria chalumnae*; Loc - *Lepisosteus oculatus*; Lja - *Lethenteron japonicum*; Laf - *Loxodonta africana*; Mmu - *Macaca mulatta*; Meu - *Macropus eugenii*; Mga - *Meleagris gallopavo*; Mmur - *Microcebus murinus*; Mdo - *Monodelphis domestica*; Mmu - *Mus musculus*; Mfu - *Mustela putorius furo*; Mlu - *Myotis lucifugus*; Nle - *Nomascus leucogenys*; Opr - *Ochotona princeps*; Oni - *Oreochromis niloticus*; Ocu - *Oryzias latipes*; Ola - *Oryzias latipes*; Oga - *Otolemur garnettii*; Oar - *Ovis aries*; Ptr - *Pan troglodytes*; Pan - *Papio anubis*; Psi - *Pelodiscus sinensis*; Pma - *Petromyzon marinus*; Pfo - *Poecilia formosa*; Pab - *Pongo abelii*; Pca - *Procavia capensis*; Pva - *Pteropus vampyrus*; Rno - *Rattus norvegicus*; Sha - *Sarcophilus harrisii*; Ssc - *Sus scrofa*; Tgu - *Taeniopygia guttata*; Tru - *Takifugu rubripes*; Tsy - *Tarsius syrichta*; Tni - *Tetraodon nigroviridis*; Tbe - *Tupaia belangeri*; Ttr - *Tursiops truncatus*; Xtr - *Xenopus tropicalis*; Xma - *Xiphophorus maculatus*;



**Fig S2. Sequence alignment of different HSP47 proteins.** Percentage identity scores of 90-100, 70-89, 50-69 are marked by black, grey and yellow shades, respectively. Known conserved ( $\geq 70\%$ ) amino acids (proposed by Irving et al 2000) are marked by different colors of hashes (above the alignment), #, # and # for presence, absence and partial presence ( $< 50\%$  of HSP47 proteins) of residues, respectively. Structural elements are marked above the alignment:  $\alpha$ -helices and  $\beta$ -sheets as  $\sim$  and  $\Rightarrow$ , respectively. Three serpin motifs are shown with black boxes. Intron position and phasing are shown above alignment with green and cyan shades for standard introns and additional intron insertions (confined to only HSP47\_1 of selected ray-finned fishes at the positions 36b and 102b), respectively. @@@ indicates N-glycosylation site (NxT, where x - any residue).

|            |   |                                                                                                                                                                                                                 |    |
|------------|---|-----------------------------------------------------------------------------------------------------------------------------------------------------------------------------------------------------------------|----|
| HsaHSP47   | 1 | -----M <b>RSL</b> ----- <b>LLLSAFC</b>                                                                                                                                                                          | 11 |
| MmuHSP47   | 1 | -----M <b>R</b> S----- <b>LLLG<b>T</b>LC</b>                                                                                                                                                                    | 10 |
| RnoHSP47   | 1 | -----M <b>R</b> S----- <b>LLLG<b>T</b>LC</b>                                                                                                                                                                    | 10 |
| GgaHSP47   | 1 | -----M <b>QI</b> ----- <b>FLVLALC</b>                                                                                                                                                                           | 10 |
| TguHSP47   | 1 | -----M <b>W</b> I----- <b>IMGLAL<b>L</b></b>                                                                                                                                                                    | 10 |
| MgaHSP47   | 1 | -----EG <b>P</b> M <b>W</b> I <b>W</b> D <b>H</b> C <b>T</b> ----- <b>ASIALMQ</b>                                                                                                                               | 18 |
| PsiHSP47   | 1 | -----M <b>W</b> V----- <b>TSLLALC</b>                                                                                                                                                                           | 10 |
| LchHSP47   | 1 | -----M <b>W</b> M----- <b>TRLLSLS</b>                                                                                                                                                                           | 10 |
| AmeHSP47_1 | 1 | -----M <b>W</b> V----- <b>SKIAALC</b>                                                                                                                                                                           | 10 |
| LocHSP47_1 | 1 | -----I <b>A</b> Q <b>L</b> P <b>S</b> I <b>T</b> E <b>S</b> M <b>W</b> V----- <b>TKLVALS</b>                                                                                                                    | 20 |
| DreHSP47_1 | 1 | -----M <b>W</b> V----- <b>SSLIALC</b>                                                                                                                                                                           | 10 |
| GacHSP47_1 | 1 | -----M <b>W</b> M----- <b>TNLVAFC</b>                                                                                                                                                                           | 10 |
| GmoHSP47_1 | 1 | -----M <b>W</b> M----- <b>TSVLALC</b>                                                                                                                                                                           | 10 |
| OlaHSP47_1 | 1 | -----M <b>W</b> T----- <b>TTIVALC</b>                                                                                                                                                                           | 10 |
| OniHSP47_1 | 1 | -----M <b>W</b> M----- <b>TNIVGLC</b>                                                                                                                                                                           | 10 |
| PfoHSP47_1 | 1 | -----M <b>W</b> M----- <b>TRAVALC</b>                                                                                                                                                                           | 10 |
| TruHSP47_1 | 1 | -----L <b>R</b> LL <b>L</b> W <b>L</b> W <b>K</b> T <b>E</b> T <b>M</b> R <b>A</b> A <b>N</b> I <b>V</b> V <b>L</b> S                                                                                           | 22 |
| XmaHSP47_1 | 1 | -----M <b>W</b> M----- <b>TTAVALC</b>                                                                                                                                                                           | 10 |
| DreHSP47_2 | 1 | -----M <b>L</b> A----- <b>SNVLLLC</b>                                                                                                                                                                           | 10 |
| OniHSP47_2 | 1 | -----M <b>W</b> V----- <b>TNLVSLV</b>                                                                                                                                                                           | 10 |
| GmoHSP47_2 | 1 | -----M <b>L</b> V----- <b>TSLVALA</b>                                                                                                                                                                           | 10 |
| XmaHSP47_2 | 1 | -----M <b>W</b> L----- <b>TLLVSLA</b>                                                                                                                                                                           | 10 |
| GacHSP47_2 | 1 | -----M <b>W</b> V----- <b>PNLAALV</b>                                                                                                                                                                           | 10 |
| PfoHSP47_2 | 1 | -----M <b>W</b> L----- <b>TFLVSLA</b>                                                                                                                                                                           | 10 |
| AmeHSP47_2 | 1 | -----M <b>W</b> V----- <b>KSL<b>L</b>ALC</b>                                                                                                                                                                    | 10 |
| LocHSP47_2 | 1 | -----A <b>M</b> A----- <b>FKA<b>A</b>VVS</b>                                                                                                                                                                    | 10 |
| AmeHSP47_3 | 1 | -----M <b>L</b> S----- <b>AAVLYLS</b>                                                                                                                                                                           | 10 |
| DreHSP47_3 | 1 | -----M <b>O</b> P <b>I</b> ----- <b>FPVPL<b>L</b>F</b>                                                                                                                                                          | 11 |
| OniHSP47_3 | 1 | -----M----- <b>LPRLPFC</b>                                                                                                                                                                                      | 8  |
| OlaHSP47_2 | - | -----                                                                                                                                                                                                           | -  |
| TruHSP47_2 | 1 | -----S <b>R</b> A <b>A</b> M <b>L</b> ----- <b>PRLPVYI</b>                                                                                                                                                      | 13 |
| TniHSP47   | - | -----                                                                                                                                                                                                           | -  |
| XmaHSP47_3 | 1 | -----M----- <b>LFRLAVC</b>                                                                                                                                                                                      | 8  |
| LocHSP47_3 | 1 | -----A <b>M</b> L----- <b>LLPATV</b>                                                                                                                                                                            | 9  |
| PfoHSP47_3 | 1 | -----                                                                                                                                                                                                           | 4  |
| PfoHSP47_4 | 1 | -----R <b>P</b> A <b>M</b> ----- <b>LLRLAVC</b>                                                                                                                                                                 | 11 |
| PmaHSP47   | 1 | -----M <b>L</b> L <b>L</b> ----- <b>EALASGA</b>                                                                                                                                                                 | 11 |
| LjaHSP47   | 1 | M <b>G</b> L <b>G</b> F <b>N</b> P <b>T</b> E <b>V</b> R <b>V</b> Q <b>R</b> D <b>Q</b> D <b>H</b> R <b>H</b> P <b>T</b> E <b>L</b> D <b>E</b> Q <b>E</b> S <b>D</b> G <b>H</b> Y <b>A</b> ----- <b>THAAAGA</b> | 41 |
|            |   | -----N-terminal                                                                                                                                                                                                 |    |

|            |    |                                                                                                                                                                                                   |    |
|------------|----|---------------------------------------------------------------------------------------------------------------------------------------------------------------------------------------------------|----|
| HsaHSP47   | 12 | LL <b>E</b> ---AALAAEVK-----KPA <del>AAAA</del> APGT---AEKLSPKAAT <b>L</b> AERSA                                                                                                                  | 48 |
| MmuHSP47   | 11 | LL <b>A</b> ---VALAAEVK-----KPLE <del>AAA</del> APGT---AEKLS <b>S</b> KAT <b>T</b> LAERST                                                                                                         | 47 |
| RnoHSP47   | 11 | LL <b>A</b> ---VALAAEVK-----KPVEATAPGT---AEKLS <b>S</b> KAT <b>T</b> LAERST                                                                                                                       | 47 |
| GgaHSP47   | 11 | GL <b>A</b> ---AAV-----PSE---DRKLSDKAT <b>T</b> LADRST                                                                                                                                            | 35 |
| TguHSP47   | 11 | GL <b>A</b> ---AAV-----PSE---DRKLSDKAT <b>T</b> LAERST                                                                                                                                            | 35 |
| MgaHSP47   | 19 | MLPEPSLAAAV-----PSE---DRKLSDKAT <b>T</b> LADRST                                                                                                                                                   | 48 |
| PsiHSP47   | 11 | ALV---AAV-----PSE---DKKLSDKAAT <b>L</b> ADRSA                                                                                                                                                     | 35 |
| LchHSP47   | 11 | IL <b>A</b> ---AVA-----ICE---EKKLSEHAT <b>T</b> LADRSS                                                                                                                                            | 35 |
| AmeHSP47_1 | 11 | LL <b>A</b> ---VAS-----CAEVKDAK <b>L</b> STHAT <b>S</b> LADTSA                                                                                                                                    | 38 |
| LocHSP47_1 | 21 | LL <b>A</b> ---ALA-----TAE---EKKLSSHAS <b>M</b> LADTSA                                                                                                                                            | 45 |
| DreHSP47_1 | 11 | LL <b>A</b> ---VAV-----SGE---DKK <b>L</b> STHAT <b>S</b> MA <b>D</b> TSA                                                                                                                          | 35 |
| GacHSP47_1 | 11 | LL <b>A</b> ---VVA-----SAE---EKKLSSYAT <b>A</b> LADHSA                                                                                                                                            | 35 |
| GmoHSP47_1 | 11 | LL <b>A</b> ---PLA-----SAD---GRK <b>L</b> SSHAT <b>L</b> LADNSA                                                                                                                                   | 35 |
| OlaHSP47_1 | 11 | LL <b>A</b> ---LGA-----SAE---DKK <b>L</b> SVHAT <b>T</b> LADNSA                                                                                                                                   | 35 |
| OniHSP47_1 | 11 | LL <b>A</b> ---LVA-----SAE---DV <b>K</b> LSTHAT <b>T</b> LADKSA                                                                                                                                   | 35 |
| PfoHSP47_1 | 11 | LL <b>A</b> ---FVA-----SAE---DKK <b>L</b> SSHANT <b>L</b> ADNSA                                                                                                                                   | 35 |
| TruHSP47_1 | 23 | LL <b>A</b> ---LLA-----SAE---DKK <b>L</b> SNHAT <b>T</b> LADNSA                                                                                                                                   | 47 |
| XmaHSP47_1 | 11 | LL <b>A</b> ---FVA-----SAE---DKK <b>L</b> SSHANT <b>L</b> ADNSA                                                                                                                                   | 35 |
| DreHSP47_2 | 11 | LL <b>A</b> ---TVSA-----N <b>K</b> T <b>L</b> SS <b>I</b> AT <b>T</b> LADNSA                                                                                                                      | 33 |
| OniHSP47_2 | 11 | LL <b>T</b> ---TAASA-----AT <b>S</b> TSK---NK <b>V</b> L <b>S</b> NHAT <b>I</b> LADSTA                                                                                                            | 40 |
| GmoHSP47_2 | 11 | LL <b>A</b> ---HTASS-----AT <b>S</b> SAP---DK <b>V</b> L <b>S</b> THAS <b>L</b> LADNSA                                                                                                            | 40 |
| XmaHSP47_2 | 11 | LL <b>A</b> ---PAISA-----AT <b>A</b> T <b>A</b> ---DK <b>V</b> L <b>S</b> NHAT <b>I</b> LADNSA                                                                                                    | 40 |
| GacHSP47_2 | 11 | LL <b>A</b> ---TTAAA-----AT <b>S</b> SAP---DQ <b>V</b> L <b>S</b> KHAT <b>T</b> LADTSA                                                                                                            | 40 |
| PfoHSP47_2 | 11 | LL <b>A</b> ---PAISA-----AT <b>A</b> T <b>A</b> ---DK <b>V</b> L <b>S</b> NHAT <b>I</b> LADNSA                                                                                                    | 40 |
| AmeHSP47_2 | 11 | LL <b>A</b> ---SVRA-----DK <b>A</b> LSSHAT <b>I</b> L <b>V</b> DSST                                                                                                                               | 33 |
| LocHSP47_2 | 11 | FL <b>I</b> ---GIV-----VAE-----P <b>V</b> AL <b>K</b> APT <b>S</b> V <b>L</b> SESTV                                                                                                               | 35 |
| AmeHSP47_3 | 11 | LL <b>N</b> LL <b>I</b> V <b>G</b> V-----G <b>S</b> SS <b>S</b> KAP <b>P</b> AT <b>G</b> EP <b>P</b> Q <b>Q</b> ASS <b>S</b> FG <b>H</b> PSW                                                      | 48 |
| DreHSP47_3 | 12 | LL <b>L</b> LA <b>Q</b> Q <b>S</b> V <b>W</b> SS-----TP <b>Q</b> EP <b>K</b> V <b>Q</b> G <b>S</b> PP <b>E</b> ISS <b>L</b> HH <b>P</b> TW                                                        | 44 |
| OniHSP47_3 | 9  | LL <b>I</b> SL <b>P</b> V <b>L</b> L <b>V</b> Q <b>G</b> SAT <b>N</b> -----SS <b>K</b> K <b>S</b> AD <b>T</b> P <b>A</b> G <b>P</b> VS <b>R</b> PP <b>L</b> PP <b>P</b> P <b>Q</b> GD <b>P</b> SW | 53 |
| OlaHSP47_2 | 1  | -----LSD <b>P</b> SW                                                                                                                                                                              | 6  |
| TruHSP47_2 | 14 | LL <b>F</b> ---L <b>P</b> L <b>A</b> P-----V <b>Q</b> R <b>S</b> T <b>A</b> D <b>S</b> SE <b>K</b> SS <b>A</b> SS <b>P</b> HL <b>P</b> PP <b>L</b> GD <b>P</b> SW                                 | 50 |
| TniHSP47   | -  | -----                                                                                                                                                                                             | -  |
| XmaHSP47_3 | 9  | LP <b>V</b> SL <b>L</b> V <b>L</b> L-----V <b>Q</b> S <b>S</b> T <b>T</b> K <b>S</b> S <b>K</b> SP <b>A</b> AS <b>V</b> SP <b>S</b> L <b>R</b> P <b>L</b> V <b>N</b> D <b>P</b> SW                | 46 |
| LocHSP47_3 | 10 | L <b>W</b> G---V <b>L</b> L-----S <b>A</b> H---C <b>K</b> PP <b>G</b> D <b>H</b> AAT <b>L</b> A <b>E</b> GSW                                                                                      | 34 |
| PfoHSP47_3 | 5  | LL <b>V</b> SL <b>R</b> V <b>L</b> L-----V <b>Q</b> S <b>G</b> AAT <b>S</b> S <b>Q</b> SP <b>A</b> AS <b>V</b> SP <b>S</b> L <b>P</b> P <b>L</b> V <b>N</b> D <b>P</b> SW                         | 42 |
| PfoHSP47_4 | 12 | LL <b>V</b> SL <b>R</b> V <b>L</b> L-----V <b>Q</b> S <b>G</b> AAT <b>S</b> S <b>Q</b> SP <b>A</b> AS <b>V</b> SP <b>S</b> L <b>P</b> P <b>L</b> V <b>N</b> D <b>P</b> SW                         | 49 |
| PmaHSP47   | 12 | LA <b>A</b> ---AAAADG <b>K</b> KAT <b>V</b> SKADAAAANN <b>A</b> T <b>A</b> P---P <b>K</b> N <b>L</b> SEH <b>A</b> KK <b>V</b> G <b>E</b> GNW                                                      | 55 |
| LjaHSP47   | 42 | AL <b>A</b> SGAAAAAADG <b>K</b> K <b>K</b> AT <b>E</b> PKADAAAV <b>T</b> N <b>A</b> T <b>A</b> A---P <b>K</b> N <b>L</b> SEH <b>A</b> KK <b>V</b> G <b>E</b> GN <b>S</b>                          | 90 |
|            |    | segment-----                                                                                                                                                                                      |    |

# 36b # # # # #

|            |    |                                                      |     |
|------------|----|------------------------------------------------------|-----|
| HsaHSP47   | 49 | GLAFSLYQAMAKDQAV--ENILVSPVVVASSLGLVSLGGKATTASQAKAV   | 96  |
| MmuHSP47   | 48 | GLAFSLYQAMAKDQAV--ENILLSPLVVASSLGLVSLGGKATTASQAKAV   | 95  |
| RnoHSP47   | 48 | GLAFSLYQAMAKDQAV--ENILLSPLVVASSLGLVSLGGKATTASQAKAV   | 95  |
| GgaHSP47   | 36 | TLAFNLYHAMAKDKNM--ENILLSPVVVASSLGLVSLGGKATTASQAKAV   | 83  |
| TguHSP47   | 36 | TLAFNLYHAMAKDKDM--ENILLSPVVVASSLGLVSLGGKATTASQAKAV   | 83  |
| MgaHSP47   | 49 | TLAFNLYHAMAKDKNM--ENILLSPVVVASSLGLVSLGGKATTASQAKAV   | 96  |
| PsiHSP47   | 36 | TLAFNLYHTMAKDKNNT--ENILVSPVVVASSLGLVSLGGKATTASQAKAV  | 83  |
| LchHSP47   | 36 | TLAFNLYHTMAKEKNM--ENILISPVVVASSLGLVSLAGKASTASQAKAV   | 83  |
| AmeHSP47_1 | 39 | NLAFNLYHNLAKEQTSQ--DNILVSPVVVASSMGLVALGGKSSSTSSQVKTV | 86  |
| LocHSP47_1 | 46 | SLAFNLYHNMAKDKNNA--ENILFSPVVVASSLGLVHLGGKSSSTASQAKTV | 93  |
| DreHSP47_1 | 36 | NLAFNLYHNVAKEKGL--ENILISPVVVASSLGMVAMGSKSSSTASQVKS   | 83  |
| GacHSP47_1 | 36 | NLAFSLYHNMAKDKDT--ENILLSPVVVASSLGMVALGGKASTASQVKT    | 83  |
| GmoHSP47_1 | 36 | DLAFSLYHNMALDKGT--GDNILVSPVVVASSLGLVALGGKAATASQVKT   | 84  |
| OlaHSP47_1 | 36 | NLAFSLYHSMADKST--DNIAISPVVVASSLGMVALGGKASTASQVKT     | 83  |
| OniHSP47_1 | 36 | NLAFSLYHTMAKEKDT--ENIISPVVVASSLGLVALGGKASTASQVKT     | 83  |
| PfoHSP47_1 | 36 | NLAFSLYHKMAQDKNT--ENIVVSPVVVASSLGLVALGGKASTASQVKT    | 83  |
| TruHSP47_1 | 48 | NLAFSLYHNMAKDKNV--ENILISPVVVASSLGMVALGGKASTASQVKT    | 95  |
| XmaHSP47_1 | 36 | NLAFSLYHKMAQDKNT--DNIVVSPVVVASSLGLVALGGKATTASQVKT    | 83  |
| DreHSP47_2 | 34 | TLAFNLYQNMAKDKI--ENILISPVVVASSLGLVALGGKSNTASQVKT     | 81  |
| OniHSP47_2 | 41 | NLAFSLYQSMVKDKNV--ENIISPVVVASSLGLVALGGKASTASQVKT     | 88  |
| GmoHSP47_2 | 41 | SLAFSLYQORVAQEKDT--ENILISPVVVASSLGLVALGGKASTASQVKS   | 88  |
| XmaHSP47_2 | 41 | NLAISLYQNMAKEKGA--ENILISPVVVASSLGLVALGGKGSSTASQVKT   | 88  |
| GacHSP47_2 | 41 | KLAFSLYQNMAKEKSV--ENILISPVVVASTLGLVALGGKAATSSQVKT    | 88  |
| PfoHSP47_2 | 41 | NLAISLYQNVAKEKGA--ENILISPVVVASSLGLVALGGKGSSTASQVKT   | 88  |
| AmeHSP47_2 | 34 | NLAFDLYHNMAKEKDM--ENILISPVVVASSLGVVALGGKSNTATQVKT    | 81  |
| LocHSP47_2 | 36 | NLGLNLYHTMVKDPKLS--ENILFSPVVVATSLGVMSLCAKDKTASQVKS   | 85  |
| AmeHSP47_3 | 49 | SLGLQLYRALRKEGSN--TNTLISPALLASSLSALSRTAKGTTAEQLQEL   | 96  |
| DreHSP47_3 | 45 | SLGLQLYRSLRTNGSQ--TNTFISPPLLANSLLALGGGAKGSSTASQFHD   | 92  |
| OniHSP47_3 | 54 | TLGLRLYQALRSDSTS--VNVLFSPLLVASSLALGEGSGGNTSNQVQGL    | 101 |
| OlaHSP47_2 | 7  | ALGLRLYRALRTPSGS--VNTLFSPLLASSLKALSEASSGKTSTQIQAL    | 54  |
| TruHSP47_2 | 51 | ALGLRLYQALRSDSRS--VNTLFSPLLAASSLALGEGGSAGASASQFQDL   | 98  |
| TniHSP47   | -  | -----                                                | -   |
| XmaHSP47_3 | 47 | PLGVRLYQALRSDPSS--VNTLFSPLLASSLEALSEGSAGKTAEQIREL    | 94  |
| LocHSP47_3 | 35 | ALGLRLYRALRNGTQP--PENPLSPLLAAASLALSOQAGGATAQOIRGL    | 83  |
| PfoHSP47_3 | 43 | PLGVRLYQALRSDPGS--VNTLFSPLLASSLEALSEGSAGKTAEQOM---   | 87  |
| PfoHSP47_4 | 50 | PLGVRLYQALRSDPGS--VNTLFSPLLASSLEALSEGSAGKTAEQOM---   | 94  |
| PmaHSP47   | 56 | AFAIDLYQSVAKAVPA--MENVVLSPLVVASALGAAQLGASSGTASRLLKA  | 104 |
| LjaHSP47   | 91 | AFAIDLYQSVAKAVPA--TENVVLSPLVVASALGAAQLGASSGTASRLLKA  | 139 |

---hA----- =s6B=> -----hB----- hC-----

#

102c

|| @@@

@@@

|             |     |                                                      |     |
|-------------|-----|------------------------------------------------------|-----|
| HsaHSP47    | 97  | LSAEQL--RDEEVHAGTGELETRSLSNSTA-----RNVTWKLGSRLY      | 135 |
| MmuHSP47    | 96  | LSAEKL--RDEEVHTGTEGELTRSLSNSTA-----RNVTWKLGSRLY      | 134 |
| RnoHSP47    | 96  | LSAEKL--RDEEVHTGTEGELTRSLSNSTA-----RNVTWKLGSRLY      | 134 |
| GgaHSP47    | 84  | LSADKL--NDDYVHSGTSELLEEVSNSTA-----RNVTWKIGNRLY       | 122 |
| TguHSP47    | 84  | LSADKL--NDDYVHSGTSELLEEVSNSTA-----RNVTWKIGNRLY       | 122 |
| MgaHSP47    | 97  | LSADKL--NDDYVHSGTSELLEEVSNSTA-----RNVTWKIGNRLY       | 135 |
| PsiHSP47    | 84  | LSADKL--NDEYVHSGTSELLEEVSNSTA-----RNVTWKLGNRLY       | 122 |
| LchHSP47    | 84  | LSVDKL--KDEHLHAGTSELLEEVSNSTA-----RNVTWKMGSRLY       | 122 |
| AmeHSP47_1  | 87  | LKADAL--KDEHLHTGTESELLEEVSDPAA-----RNVTWKINNRLY      | 125 |
| LocHSP47_1  | 94  | LSADKV--KDDQLHTGTESELLEEVSNSTA-----RNVTWKIGSRLY      | 132 |
| DreHSP47_1  | 84  | LKADAL--KDEHLHTGTESELLEEVSDPQT-----RNVTWKISNRLY      | 122 |
| GachHSP47_1 | 84  | LSADKL--KDEHLHAGTSELLEEVSDAKS-----RNTTWKINNRLY       | 122 |
| GmoHSP47_1  | 85  | LRADAL--KDEHLHAGTSELMSEVSDAKT-----RNTTWKISNRLY       | 123 |
| OlaHSP47_1  | 84  | LSADKL--KDEHLHSGTSELLEEVSDTKA-----RNTTWKINNRLY       | 122 |
| OniHSP47_1  | 84  | LSADKL--KDEHLHAGTSELLEEVSNAKT-----RNTTWKINNRLY       | 122 |
| PfoHSP47_1  | 84  | LSADKL--KDEHLHAGTSELLEEVSDQKT-----RNSTWKINNRLY       | 122 |
| TruHSP47_1  | 96  | LSADKL--KDEHLHAGTSELLETELSDADK-----RNTTWKINNRLY      | 134 |
| XmaHSP47_1  | 84  | LSADKL--KDEHLHAGTSELLESVVSNQKT-----RNSTWKINNRLY      | 122 |
| DreHSP47_2  | 82  | LSAASV--KDEQLHSGTSELLEEVSNPKA-----RNVTWKISNRFY       | 120 |
| OniHSP47_2  | 89  | LNVAKV--KDEHLHSSLAELLEIEMSDPKT-----RNITWKISNRLY      | 127 |
| GmoHSP47_2  | 89  | LKADKL--KDEQLHAGTGELESEVSDPAV-----RNVTWKIRSRLY       | 127 |
| XmaHSP47_2  | 89  | LNAAKV--QDEQLHSGLAELLEEVSDPKE-----RNVTWKISNRLY       | 127 |
| GachHSP47_2 | 89  | LNAAKV--KDEQLHSGLAELLEEVSDPKT-----RNVTWKISNRMY       | 127 |
| PfoHSP47_2  | 89  | LNAAKV--QDEQLHSGLAELLEEVSDPKE-----RNVTWKISNRLY       | 127 |
| AmeHSP47_2  | 82  | LSGNKV--KDENLHSSLAELLEEVSNSTE-----RNVTWKISNRLY       | 120 |
| LocHSP47_2  | 86  | LRVN-L--HEDKLHPAFSELLEFNDVSNETA-----RNTTWKVGSRLY     | 123 |
| AmeHSP47_3  | 97  | LKNAKV---EKKTEEALSDTEKSMREGNG-----TSYTLHGSSALF       | 134 |
| DreHSP47_3  | 93  | LRITK---NENVVGETLTTAOKAVHESNG-----TSYILHSSSALF       | 130 |
| OniHSP47_3  | 102 | LNPPSPVKADTQVPERLAELKSFSEANG-----TSFHLHASSAVF        | 142 |
| OlaHSP47_2  | 55  | LRPET---PSETSDGVLSGALKRFTEADG-----SSFHLRWSSAVF       | 92  |
| TruHSP47_2  | 99  | LKASSS--AKAGAEL--LSESLKSLGKSNG-----TSFHAAHASTALF     | 136 |
| TniHSP47    | -   | -----                                                | -   |
| XmaHSP47_3  | 95  | LQPPSG--TKEAVGELLESMALLESFVKANG-----TSFQIHASSGVF     | 133 |
| LocHSP47_3  | 84  | LGAGAM--TPDALAGALAGLLEDELHARHN-----ASYALHAAGALF      | 122 |
| PfoHSP47_3  | 88  | --PPSG--TKEAVGELLESMALLESFVKANG-----TSFQIHASSCVF     | 124 |
| PfoHSP47_4  | 95  | --PPSG--TKEAVGELLESMALLESFVKANG-----TSFQIHASSCVF     | 131 |
| PmaHSP47    | 105 | INPSGL--PGEGFHSGLAEVVIGDLASQEEEEAAAAAATWRNHTWKAASRVY | 152 |
| LjaHSP47    | 140 | INPSGL--PGEGFHSGLAEVVIGDLASQEEEEAAAAAATWRNHTWKAASRVY | 187 |

-----hD----- ==s2A==

|            |     |                          |                  |                  |            |            |         |         |       |        |      |     |
|------------|-----|--------------------------|------------------|------------------|------------|------------|---------|---------|-------|--------|------|-----|
|            |     | #                        |                  | #                |            | ##         | #       |         | #     |        |      |     |
| HsaHSP47   | 136 | GPSSVSFADDFVRRSSKQHYNCEH | SKINFRDKRSALQSIN | EWAAQT           | DG-K       |            |         |         |       | 184    |      |     |
| MmuHSP47   | 135 | GPSSVSFADDFVRRSSKQHYNCEH | SKINFRDKRSALQSIN | EWASQT           | DG-K       |            |         |         |       | 183    |      |     |
| RnoHSP47   | 135 | GPSSVSFADDFVRRSSKQHYNCEH | SKINFRDKRSALQSIN | EWASQT           | DG-K       |            |         |         |       | 183    |      |     |
| GgaHSP47   | 123 | GPASINFADDFVKNSKKHYNYEH  | SKINFRDKRSALKSIN | EWAAQT           | DG-K       |            |         |         |       | 171    |      |     |
| TguHSP47   | 123 | GPASITFAEDFVKNSKKHYNYEH  | SKINFRDKRSALKSIN | EWAAQT           | DG-K       |            |         |         |       | 171    |      |     |
| MgaHSP47   | 136 | GPASINFADDFVKNSKKHYNYEH  | SKINFRDKRSALKSIN | EWAAQT           | DG-K       |            |         |         |       | 184    |      |     |
| PsiHSP47   | 123 | GPSSINFADDFVKSSKKHYNYEH  | SKINFRDKRSALKSIN | EWASQT           | DG-K       |            |         |         |       | 171    |      |     |
| LchHSP47   | 123 | GPSSVTFADDFVRRS          | KKHYNSIDH        | SKINFRDKRSALKSIN | DWAAKT     | DG-K       |         |         |       | 171    |      |     |
| AmeHSP47_1 | 126 | GPSSVSFAEDFVKSSKKHYNYEH  | SKINFRDKRSAIN    | SIN              | EWAAKST    | DG-K       |         |         |       | 174    |      |     |
| LocHSP47_1 | 133 | GPSSVNFADDFVKSSKKHYNYEH  | SKINFRDKRS       | AVKSIN           | EWAAQT     | DG-K       |         |         |       | 181    |      |     |
| DreHSP47_1 | 123 | GPSSVSFAEDFVKNSKKHYNYEH  | SKINFRDKRSAIN    | SIN              | EWAAKT     | DG-K       |         |         |       | 171    |      |     |
| GacHSP47_1 | 123 | GPSSVSFADDFVKNSKKHYNYD   | H                | SKINFRDKRS       | AVNSIN     | EWAAKST    | DG-K    |         |       | 171    |      |     |
| GmoHSP47_1 | 124 | GPSSVSFADDFVKDSKKRYNYD   | H                | SKINLKD          | KKSAVNSIN  | EWAAAST    | DG-K    |         |       | 172    |      |     |
| OlaHSP47_1 | 123 | GPSTVSFADDFVKNSKKHYNYD   | H                | SKINL            | RDKRS      | AVNSIN     | EWAAKST | DG-K    |       | 171    |      |     |
| OniHSP47_1 | 123 | GPSSVSFAEDFVKNSKKHYNYD   | H                | SKINFRDKRS       | AVNSIN     | EWAAKST    | DG-K    |         |       | 171    |      |     |
| PfoHSP47_1 | 123 | GPSSVSFADDFVKTSKKHYNYD   | H                | SKINFRDKRS       | AVNSIN     | EWAAKST    | DG-K    |         |       | 171    |      |     |
| TruHSP47_1 | 135 | GPSSVSFSDDFVKSSKKHYKYD   | H                | SKINFRDKRS       | AVNSIN     | EWAAKAT    | DG-K    |         |       | 183    |      |     |
| XmaHSP47_1 | 123 | GPSSVSFADDFVKTSKKHYNYD   | H                | SKINFRDKRS       | AVNSIN     | EWAAKST    | DG-K    |         |       | 171    |      |     |
| DreHSP47_2 | 121 | GPSSVSFVDDFLKSSKKHYNYD   | H                | SKINFRDKRS       | AVKAIN     | DWASKST    | DG-K    |         |       | 169    |      |     |
| OniHSP47_2 | 128 | GPSSVTFVDDFVKSSKKHYNCE   | H                | SKINIR           | DKKSAVKSIN | EWAAANST   | DG-K    |         |       | 176    |      |     |
| GmoHSP47_2 | 128 | GPSSITFTESFLKSSKKLYNCE   | H                | SKINF            | KDSAMKAIN  | EWGVKST    | DG-K    |         |       | 176    |      |     |
| XmaHSP47_2 | 128 | GPSSVTFADDFVKSSKKHYKCD   | H                | SKINFRDKK        | SAVNSIN    | EWAAKST    | DG-K    |         |       | 176    |      |     |
| GacHSP47_2 | 128 | GPSSVTFVEDFIRSSKKHYNC    | D                | SKINF            | HDKSAASSIN | EWAAKST    | DG-K    |         |       | 176    |      |     |
| PfoHSP47_2 | 128 | GPSSVTFADDFVKSSKKHYKCD   | H                | SKINFRDKK        | SAIN       | SINKWAAKST | DG-K    |         |       | 176    |      |     |
| AmeHSP47_2 | 121 | GPSSVNFVDDFLKNSKKHYKYE   | H                | SKINFRDKRS       | AVKAIN     | EWGSKST    | DG-K    |         |       | 169    |      |     |
| LocHSP47_2 | 124 | GPTSAELRQEFVEKSRKKHYRHD  | H                | SKINFRDKRN       | ALKSIN     | EWAAENT    | DG-R    |         |       | 172    |      |     |
| AmeHSP47_3 | 135 | SKQVPTLEKSLLEELQAQFGLGH  | VALGAGGKEADMEK   | LR               | SWAKGG     | MGGLE      |         |         |       | 184    |      |     |
| DreHSP47_3 | 131 | SKQAPELEKSFLEKLQTHFGM    | QHV              | AL               | EDAQKQSD   | MEKLQY     | WAKSGM  | DGEE    |       | 180    |      |     |
| OniHSP47_3 | 143 | SKQVSPVDQAFVKQSQTRFRVK   | H                | QTLG             | KGDSKADL   | QQLD       | WAKATL  | SGLE    |       | 192    |      |     |
| OlaHSP47_2 | 93  | TKQAPALRQAFVKESQSKFGL    | H                | QTLG             | KGDP       | SADL       | KRLGD   | WAKAGT  | GGLE  | 142    |      |     |
| TruHSP47_2 | 137 | SKEAPQVSQAFVKDSQARFGL    | H                | QPLG             | KGDSKADL   | KRL        | RS      | WAKRATS | --R   | 184    |      |     |
| TniHSP47   | -   | -----                    |                  |                  |            |            |         |         |       | -      |      |     |
| XmaHSP47_3 | 134 | TKQAPAISQAF              | FAKEIQSRFR       | LQ               | HRTMG      | KGDAKADL   | KQLRE   | WAE     | EAL   | SGKE   | 183  |     |
| LocHSP47_3 | 123 | TSKGQSPRQAF              | LKEAETRLR        | LQ               | HATL       | SPGDKQ     | GLRAL   | N       | AWA   | ERATQ  | -A   | 171 |
| PfoHSP47_3 | 125 | TKQAPAVGQAF              | FAKEIQSRFR       | LQ               | HRTL       | GKDAKADL   | RQLC    | Q       | WAE   | EAL    | GGKE | 174 |
| PfoHSP47_4 | 132 | TKQAPAVGQAF              | FAKEIQSRFR       | LQ               | HRTL       | GKDAKADL   | RQLC    | Q       | WAE   | EAL    | GGKE | 181 |
| PmaHSP47   | 153 | APSGVTF                  | SQGFVSSSKARY     | GLO              | HD         | KVN        | LKDKR   | GAL     | KALNE | WAAQNT | DG-K | 201 |
| LjaHSP47   | 188 | APSGVTF                  | SQGFVSSSKARY     | GLO              | HD         | MVN        | LKDKR   | GAL     | KALNE | WAAQNT | DG-K | 236 |

==> -----hE----- ==> -----hF-----  
s1A



|             |     | #                            | #                 | ##                 | #192a             | #                  |                    |     |
|-------------|-----|------------------------------|-------------------|--------------------|-------------------|--------------------|--------------------|-----|
| HsaHSP47    | 185 | LPEVTKDVERTD                 | GALLV             | -                  | NAMFFKPHWD        | --                 | EKFHHKMVDNRGFMVTRS | 231 |
| MmuHSP47    | 184 | LPEVTKDVERTD                 | GALLV             | -                  | NAMFFKPHWD        | --                 | EKFHHKMVDNRGFMVTRS | 230 |
| RnoHSP47    | 184 | LPEVTKDVERTD                 | GALLV             | -                  | NAMFFKPHWD        | --                 | EKFHHKMVDNRGFMVTRS | 230 |
| GgaHSP47    | 172 | LPEVTKDVEKTD                 | GALIV             | -                  | NAMFFKPHWD        | --                 | EKFHHKMVDNRGFMVTRS | 218 |
| TguHSP47    | 172 | LPEVTKDVEKTD                 | GALIV             | -                  | NAMFFKPHWD        | --                 | EKFHHKMVDNRGFMVTRS | 218 |
| MgaHSP47    | 185 | LPEVTKDVEKTD                 | GALIV             | -                  | NAMFFKPHWD        | --                 | EKFHHKMVDN-----    | 224 |
| PsiHSP47    | 172 | LPEVTKDVEKTD                 | GALIV             | -                  | NAMFFKPHWD        | --                 | EKFHHKMVDNRGFMVTRS | 218 |
| LchHSP47    | 172 | LPEITKDVEKTD                 | GAMII             | -                  | NAMFYKPHWD        | --                 | EKFHEKMVDNRGFMVSR  | 218 |
| AmeHSP47_1  | 175 | LPEITKDVKNTD                 | GAMII             | -                  | NAMFFKPHWD        | --                 | EKFHHKMVDNRAFVLR   | 221 |
| LochHSP47_1 | 182 | LPEVTKDVEKTD                 | GAMIV             | -                  | NAMFFKPHWD        | --                 | EKFHHKMVDNRGFLVSR  | 228 |
| DreHSP47_1  | 172 | LPEITKDVKNTD                 | GAMIV             | -                  | NAMFFKPHWD        | --                 | EKFHHKMVDNRGFLVSR  | 218 |
| GachHSP47_1 | 172 | LTEITKDVQNTD                 | GAMIV             | -                  | NAMFYKPHWF        | --                 | ETFNDQMVDRGFLVTR   | 218 |
| GmoHSP47_1  | 173 | LPEVTKDVPNAD                 | GAMLI             | -                  | NAMFFKPHWD        | --                 | EMFHESMVDNRSFMVTR  | 219 |
| OlaHSP47_1  | 172 | LPEVTKEVQNPD                 | GAMIV             | -                  | NAMFFKPHWE        | --                 | ERFHEKMVDTRGFLVTR  | 218 |
| OniHSP47_1  | 172 | LPEVTKDVQNPD                 | GAMIV             | -                  | NAMFFKPHWE        | --                 | EKFHDKMVDTRGFLVTR  | 218 |
| PfoHSP47_1  | 172 | LPEITKDVQNPD                 | GAMIV             | -                  | NAMFFKPHWD        | --                 | ERFHEKMVDNRGFLVTR  | 218 |
| TruHSP47_1  | 184 | LPEITKDVQNAD                 | GAMIV             | -                  | NAMFFKPHWD        | --                 | ERFHDKMVDTRGFLVTR  | 230 |
| XmaHSP47_1  | 172 | LPEITKDVQNPD                 | GAMIV             | -                  | NAMFFKPHWD        | --                 | ERFHEKMVDNRGFLVTR  | 218 |
| DreHSP47_2  | 170 | LPEVTKDVEKTD                 | GAMII             | -                  | NAMFYKPHWN        | --                 | EQFHHKMVDNRGFLVHR  | 216 |
| OniHSP47_2  | 177 | LPEVTKNVEKTD                 | GAMII             | -                  | SAMFFKCHWD        | --                 | EQFHREMVDNRGFMVSR  | 223 |
| GmoHSP47_2  | 177 | LPEVAKNVEKTD                 | GAMII             | -                  | NAMFFKPHWN        | --                 | EQFHPKMVDGRVFLASR  | 223 |
| XmaHSP47_2  | 177 | LPEVTKDVENTD                 | GAMII             | -                  | NAMFFKPHWD        | --                 | EQFHPTMVDNRGFLVSG  | 223 |
| GachHSP47_2 | 177 | LPEVTKVVEQTD                 | GAMIV             | -                  | NAMFFKPHWD        | --                 | EQFHHQMVDRGFMVLR   | 223 |
| PfoHSP47_2  | 177 | LPEVTKDVENTD                 | GAMII             | -                  | NAMFFKPHWD        | --                 | EQFHPTMVDNRGFLVSR  | 223 |
| AmeHSP47_2  | 170 | LPEITKDVEKTD                 | GAMII             | -                  | NAMFYKPHWD        | --                 | QQFHHKMVDNRGFLVHR  | 216 |
| LochHSP47_2 | 173 | LSEITRDLPGSD                 | GAMFV             | -                  | NAMHFKPHWG        | --                 | EAFHHKMVDNRGFLMSK  | 219 |
| AmeHSP47_3  | 185 | GSLKKEGPDAKD                 | GAVILANALHFKGLW   | --                 | RSFETENQDLRTFLGTY | --                 |                    | 230 |
| DreHSP47_3  | 181 | TAALKTALESKAGALILANALHFKGLW  | --                | RGFYHENQDVRSFLGTY  | --                |                    | 226                |     |
| OniHSP47_3  | 193 | GTPLEAEIKAKAGALILANAVRLKGLWE | --                | REFSEESTDRRTFLGKTY | --                |                    | 238                |     |
| OlaHSP47_2  | 143 | GAPLEGGIKAKAGAVILANALHFKGLF  | LLMNYHYHIFKAVSAYF | --                 | EFFI              |                    | 190                |     |
| TruHSP47_2  | 185 | RNELSSDAYRSSQLLFPPEFKPLWE    | --                | REFGEGSSDLRTFLGKTY | --                |                    | 230                |     |
| TniHSP47    | -   | -----                        | -----             | -----              | -----             | -----              | -                  |     |
| XmaHSP47_3  | 184 | MAPLEAEIKAKAGAMILTNALHFKGLWQ | --                | RELSEESTDRRTFLGKTY | --                |                    | 229                |     |
| LochHSP47_3 | 172 | VLEVAKEMPASPGALLV            | -                 | NALHFKGLWQ         | --                | REFDVEGIDFRRFLGSKY | 216                |     |
| PfoHSP47_3  | 175 | GAPLEAEIKAKAGAMVLTNALHFKGLWQ | --                | RELSEESADRRTFLGKTY | --                |                    | 220                |     |
| PfoHSP47_4  | 182 | GAPLEAEIKAKAGAMVLTNALHFKGLWQ | --                | RELSEESADRRTFLGKTY | --                |                    | 227                |     |
| PmaHSP47    | 202 | VKEVAKELDGADGAVFV            | -                 | NALFFKGRWN         | --                | EKFHHQMVDRGFLVTR   | 248                |     |
| LjaHSP47    | 237 | VKEVAKELNGADGAVFV            | -                 | NALFFKGRWN         | --                | EKFHHQMVDRGFLVTR   | 283                |     |

=====**s3A**=====> ----- **s4C**=====  
hF1

Motif 1

# ## 225a # ##

|            |     |                                                                                                                    |     |
|------------|-----|--------------------------------------------------------------------------------------------------------------------|-----|
| HsaHSP47   | 232 | VGVM <del>MMHRT</del> -GLYNYDDEKEKLOIVEMPLAHLKSSLIILMPHHVEPLER                                                     | 280 |
| MmuHSP47   | 231 | VGVM <del>MMHRT</del> -GLYNYDDEKEKLOVEMPLAHLKSSLIILMPHHVEPLER                                                      | 279 |
| RnoHSP47   | 231 | VGVM <del>MMHRT</del> -GLYNYDDEKEKLOVEMPLAHLKSSLIILMPHHVEPLER                                                      | 279 |
| GgaHSP47   | 219 | VGVP <del>MMHRT</del> -GLYNYDDEAEKLOVEMPLAHLKSSMIFIMP <del>NHVEPLER</del>                                          | 267 |
| TguHSP47   | 219 | VGVP <del>MMHRT</del> -GLYNYDDEAEKLOVEMPLAHLKSSMIFIMP <del>NHVEPLER</del>                                          | 267 |
| MgaHSP47   | 225 | VGVP <del>MMHRT</del> -GLYNYDDEAEKLOVEMPLAHLKSSMIFIMP <del>NHVEPLER</del>                                          | 273 |
| PsiHSP47   | 219 | VGVP <del>MMHRT</del> -GLYNYDDETEKLOIVEMPLAHLKSSMIFIMP <del>NHVEPLER</del>                                         | 267 |
| LchHSP47   | 219 | VAVP <del>MMHRT</del> -GLYHFDDEVNKLQVLEMP <del>AHLKSSMLFVMPYHVEQLDR</del>                                          | 267 |
| AmeHSP47_1 | 222 | VSVP <del>MMHRT</del> -GLYPFHEDTENRLFV <del>LNMP</del> LAHKKSSVIFIMP <del>YHVEPLER</del>                           | 270 |
| LocHSP47_1 | 229 | VSVP <del>MMHRT</del> -GLYMFHEDSEKRLYVLSMPLA <del>HKMSSMI</del> IIMP <del>YHVEPLER</del>                           | 277 |
| DreHSP47_1 | 219 | VSVP <del>MMHRT</del> -GIYGFYEDTENRFLIVSMPLA <del>HKKSSMIF</del> IIMP <del>YHVEPLDR</del>                          | 267 |
| GacHSP47_1 | 219 | VGVP <del>MMHRT</del> -GLYDFHEDKENRLFV <del>LNMP</del> L <del>GKKEASMI</del> LIMP <del>YHLEPLAR</del>              | 267 |
| GmoHSP47_1 | 220 | VGIP <del>MMHRT</del> -GLYDFHEDTENRFL <del>FALNMP</del> L <del>GKNQASMI</del> LIMP <del>YYLEPLER</del>             | 268 |
| OlaHSP47_1 | 219 | VGVS <del>MMHRT</del> -GLYDFHEDTENKIFV <del>LNMP</del> L <del>GQKQASMI</del> LIMP <del>YHLEPLER</del>              | 267 |
| OniHSP47_1 | 219 | VGVP <del>MMHRT</del> -GLYDFYEDTENKLFV <del>LNMP</del> L <del>GQKQASMI</del> LIMP <del>YHLEPLER</del>              | 267 |
| PfoHSP47_1 | 219 | VGVS <del>MMHRT</del> -GLYDFYEDKENNLYI <del>LNMP</del> L <del>GKQASMI</del> LIMP <del>YHLEPLER</del>               | 267 |
| TruHSP47_1 | 231 | IGIS <del>MMHRT</del> -GLYDFYDDEVNRIYV <del>LNMP</del> L <del>GQKQASMI</del> LIMP <del>YHLEPLER</del>              | 279 |
| XmaHSP47_1 | 219 | VGVS <del>MMHRT</del> -GLYDFYEDKENNLYI <del>LNMP</del> L <del>GKKEASMI</del> LIMP <del>YHLEPLDR</del>              | 267 |
| DreHSP47_2 | 217 | VSVP <del>MMHRT</del> -GIYGF <del>LDDTTNKL</del> L <del>VLEMP</del> LAH <del>KMSSVL</del> IIMP <del>YHVESLER</del> | 265 |
| OniHSP47_2 | 224 | VSVP <del>MMHRT</del> -GLFGFYDDKDNKLSI <del>LSMP</del> L <del>SHKKSTVVF</del> IIMP <del>YHVEPLDR</del>             | 272 |
| GmoHSP47_2 | 224 | ISVP <del>MMHRT</del> -GLYDYEDVDNKLTVLSI <del>PLA</del> HLKSSVVFV <del>MP</del> LH <del>VEPLER</del>               | 272 |
| XmaHSP47_2 | 224 | VALQ <del>MMHRT</del> -GLDFDYDDTTNKL <del>YLLSMP</del> LAH <del>KKSTVVFVMP</del> HH <del>MEPLDR</del>              | 272 |
| GacHSP47_2 | 224 | VSVP <del>MMHRT</del> -GLYGFYDDKTNKLT <del>LLSMP</del> LAH <del>KKSTVVFV</del> IM <del>PHQVEPLQR</del>             | 272 |
| PfoHSP47_2 | 224 | VALQ <del>MMHRT</del> VGLDFDYDDTTNKL <del>YLLSLP</del> LAH <del>KKSTVVF</del> IIMP <del>YHMEPLDR</del>             | 273 |
| AmeHSP47_2 | 217 | VSVP <del>MMHRT</del> -GIYGFLED <del>TNNLFV</del> LEMP <del>LAHKMSSVVF</del> IM <del>TYHVEPLER</del>               | 265 |
| LocHSP47_2 | 220 | VSVP <del>MMHRT</del> -GFYK <del>FYED</del> EVNQL <del>IVEM</del> PL <del>GHRQTSMMI</del> IMP <del>FFHVEPLER</del> | 268 |
| AmeHSP47_3 | 231 | TKVM <del>MMHRA</del> -GVYRHYEDMENMVQV <del>IELG</del> FW <del>SGKASMLL</del> LIL <del>PFHVESLAR</del>             | 279 |
| DreHSP47_3 | 227 | TKVP <del>MMHRS</del> -GVYRHYEDMENMVQV <del>ELG</del> FW <del>EKGASIVLLL</del> PF <del>HVESLAR</del>               | 275 |
| OniHSP47_3 | 239 | TKVVM <del>MMHRA</del> -GLYRFHEDTDNMVQV <del>LEAP</del> LW <del>GGRASVLLL</del> PF <del>HVENLAR</del>              | 287 |
| OlaHSP47_2 | 191 | EGKSL <del>FSP</del> LTGLFRFHEDMENMVQV <del>LEVPL</del> W <del>GQASAVFLMP</del> PF <del>HVENLAR</del>              | 240 |
| TruHSP47_2 | 231 | TKIM <del>MMHRA</del> -GLYRFHEDIQNMVQV <del>LEAP</del> LW <del>GKASMVLLL</del> PF <del>HVEDLAR</del>               | 279 |
| TniHSP47   | -   | -----                                                                                                              | -   |
| XmaHSP47_3 | 230 | TKVIM <del>MMHRA</del> -GRYRFHEDVDNMVQV <del>LEAP</del> LW <del>GKASLVLLL</del> PF <del>HVENLAR</del>              | 278 |
| LocHSP47_3 | 217 | TKVAM <del>MMHRA</del> -GIYRHYEDLEKMVQV <del>IEM</del> PLAG <del>GSASMVLLL</del> PL <del>HVEPLSR</del>             | 265 |
| PfoHSP47_3 | 221 | TKVTM <del>MMHRA</del> -SRYRFHEDVDNMVQV <del>LEAP</del> LW <del>GGRASLVLLL</del> PF <del>HVENLAR</del>             | 269 |
| PfoHSP47_4 | 228 | TKVTM <del>MMHRA</del> -GRYRFHEDVDNMVQV <del>LEAP</del> LW <del>GGRASLVLLL</del> PF <del>HVENLAR</del>             | 276 |
| PmaHSP47   | 249 | ISIQM <del>MHRT</del> -GFYNFYHDEKAQV <del>OLLEMO</del> L <del>KGNLESLLIAL</del> PL <del>HTESLER</del>              | 297 |
| LjaHSP47   | 284 | ISIQM <del>MHRT</del> -GFYNFYHDEKAQV <del>OLLEMO</del> L <del>KGSLESLLIVL</del> PL <del>HTESLER</del>              | 332 |

====s3C=====> s1B> ==s2B=> ==s3B==> ---



| Species    | Position | Sequence                                 | Position           |
|------------|----------|------------------------------------------|--------------------|
| HsaHSP47   | 329      | AIDKNKADLSRMSGKKD--LYLASVVFHATAFELDTE    | GNPFDQDIYGREE 375  |
| MmuHSP47   | 328      | AIDKNKADLSRMSGKKD--LYLASVVFHATAFEWDE     | GNPFDQDIYGREE 374  |
| RnoHSP47   | 328      | AIDKNKADLSRMSGKKD--LYLASVVFHATAFEWDE     | GNPFDQDIYGREE 374  |
| GgaHSP47   | 316      | AIDKTKADLSKISGKKD--LYLSNVFHAAALEWDT      | GNPYDADIYGREE 362  |
| TguHSP47   | 316      | AIDKTKADLSKISGKKD--LYLSNVFHAAALEWDE      | GNPYDADIYGREE 362  |
| MgaHSP47   | 322      | AIDKTKADLSKISGKKD--LYLSNVFHAAALEWDT      | GNPYDADIYGREE 368  |
| PsiHSP47   | 316      | AIDKNKADLSKISGKKD--LYLSNVFHAAALEWDE      | GNPFDADIYGREE 362  |
| LchHSP47   | 316      | AVDKAKADLSNISGKKD--LYLANVFHAAALEWDE      | GNPFDSSIYSREE 362  |
| AmeHSP47_1 | 319      | VVDKSKADLSNISGKKD--LYLSNVFHASAEWDE       | GNPFDTSIFGSDK 365  |
| LocHSP47_1 | 326      | AVDKAKADLSNISGKKD--LYLSNVFHASAMELDE      | GNPFDTNIYGSEK 372  |
| DreHSP47_1 | 316      | AVDKSKADLSNISGKKD--LYLSNVFHASSLEWDE      | GNPFDPSIFGSEK 362  |
| GacHSP47_1 | 316      | AVDKSKADLSNISGKKD--LYLSNVFHASALELDVK     | GNPFDTSVYGS GK 362 |
| GmoHSP47_1 | 317      | AVDKAKADLSNITGKKN--LYLSNVFHASALELDTL     | GNPFDTSIFGSEK 363  |
| OlaHSP47_1 | 316      | AVDKSKADLSNISGKKD--LYLSNLFHASALELDVD     | GNPYDTSIFGTDK 362  |
| OniHSP47_1 | 316      | AVDKAKADLSNISGKKD--LYLSSVVFHASALELDIE    | GNPYDTSIFGTEK 362  |
| PfoHSP47_1 | 316      | AVDKSKADLSNISGKKD--LYLSNVFHASALELDVD     | GNPYDTSIFGTEK 362  |
| TruHSP47_1 | 328      | AVDKAKADLSNISGKKD--LYLSNVFHASAVELDVD     | GNPYDTSIFGTEK 374  |
| XmaHSP47_1 | 316      | AVDKSKADLSNISGKKD--LYLSNVFHASALELDVD     | GNPYDTSIFGTDK 362  |
| DreHSP47_2 | 314      | AVDKAKADLSNISGKKD--LYLSNVFHASAMEWDE      | GNPPDTSIFGTDQ 360  |
| OniHSP47_2 | 321      | AVDKSKADFSNISGKKD--LYLSSVVFHASALEWDT     | GNEIDTSIFGTDK 367  |
| GmoHSP47_2 | 321      | AVDKAKADLSNISGKKD--LYLANVFHASAVEWATE     | GNPIDPTVIYSSDK 367 |
| XmaHSP47_2 | 321      | AVDKSKADLSNVSGKKD--LYLSGVLHAAALEWDTH     | GNEIDTSIFGTEK 367  |
| GacHSP47_2 | 321      | AVDKSKADLSKISGKKD--LYLASVVFHASAMEWDT     | GNEMDSLFGTDK 367   |
| PfoHSP47_2 | 322      | AVDKSKADLSNVSGKKD--LYLSGVLHAAALEWDTH     | GNEIDTSIFGTEK 368  |
| AmeHSP47_2 | 314      | AVDKTKADLSNISGKKE--LYLSNVFHASALEWDE      | GNPPDTSVFGSDK 360  |
| LocHSP47_2 | 317      | AVDKSKADFSGMTGKKD--LHLNLFHATAFDLDT       | GNPFDQDIYGREE 363  |
| AmeHSP47_3 | 328      | AWDQKVAADFSGLSKSGKGLHLLGGVLHWASLELASES   | GSKDGSN--EDEH 375  |
| DreHSP47_3 | 324      | AWNETSADFSTLSSLGRGKHLHGGVLFHWTTLELAPES   | GSKDDVL--EDED 371  |
| OniHSP47_3 | 336      | AWDQKLADFSGVSAKSGKGLHLLGGVLFHWATLELAAQA  | GKEDADL--QEEH 383  |
| OlaHSP47_2 | 288      | AWDQKVAADFSGVSDKSGKGLHLLGAVLHWASME LAPQA | GEGEVDV--EEN 334   |
| TruHSP47_2 | 328      | AWDQKVAADFSGVSGKAKGKHLHLLSAVLQWTSLELAAQA | GPGEDQL--EEEE 375  |
| TniHSP47   | 13       | AWDQKVAADFSGVSGKSEKGLHLLGAVLQWTSLELAAQA  | GPGEEL--EEEK 60    |
| XmaHSP47_3 | 327      | AWDQKAADFSGMSDKSGKGLHLLGGALHWASLELDPAA   | GEQVDL--EEEN 374   |
| LocHSP47_3 | 316      | AWDGARADFAGVTGQKG--LRLAAVLFHAAALELGPE    | GAPVQQ--EEE- 358   |
| PfoHSP47_3 | 318      | AWDQKADFSGMSDKSGKGLHLLGGALHWASLELGPTA    | GKEDADL--EEEN 365  |
| PfoHSP47_4 | -        | -----                                    | -                  |
| PmaHSP47   | 346      | VGDKAKADFSGMTGGRE--LHLGSLLEHTAALEFDTE    | GEEYDMSVHGHPD 392  |
| LjaHSP47   | 381      | VGDKAKADFSGMTGGRE--LHLGSLLEHAAALEFDTE    | GEEYDMSVHGHPD 427  |

====s5A==> =====s4A=====

Motif 2

|            |     |                     |         |        |          |         |              |        |     |
|------------|-----|---------------------|---------|--------|----------|---------|--------------|--------|-----|
|            |     | ##                  |         | ##     | #        |         | #            |        |     |
| HsaHSP47   | 376 | LRSPKLFYADHPP       | IFLVRD  | TQSGSL | IFIGRLV  | RPKGD   | KMRDEL       | 418    |     |
| MmuHSP47   | 375 | LRSPKLFYADHPP       | IFLVRDN | QSGSL  | IFIGRLV  | RPKGD   | KMRDEL       | 417    |     |
| RnoHSP47   | 375 | LRSPKLFYADHPP       | IFLVRDN | QSGSL  | IFIGRLV  | RPKGD   | KMRDEL       | 417    |     |
| GgaHSP47   | 363 | MRNPCLFYADHPP       | IFMIKDS | SKTNS  | ILFIGRLV | RPKGD   | KMRDEL       | 405    |     |
| TguHSP47   | 363 | MRNPCLFYADHPP       | IFMIKDT | TKTNS  | ILFIGRLV | RPKGD   | KMRDEL       | 405    |     |
| MgaHSP47   | 369 | MRNPCLFYADHPP       | IFMIKDS | SKTNS  | ILFIGRLV | RPKGD   | KMRDEL       | 411    |     |
| PsiHSP47   | 363 | MRNPRLFYADHPP       | VFVIKDN | NKTNS  | ILFIGRLV | RPKGD   | KMRDEL       | 405    |     |
| LchHSP47   | 363 | MRNPCLFYVDHPP       | VFLIKDN | NKTNS  | ILFIGRLV | KPKGE   | KMRDEL       | 405    |     |
| AmeHSP47_1 | 366 | LRNPCLFYADHPP       | IFVVKDN | QNTNS  | ILYIGRLV | KPKGE   | KMRDEL       | 408    |     |
| LocHSP47_1 | 373 | LRNPCLFYADHPP       | IFVIKDN | NKTNS  | ILYIGRLV | RPKGD   | KMRDEL       | 415    |     |
| DreHSP47_1 | 363 | MRNPCLFYADHPP       | IFLVKDN | NKTNS  | ILFIGRLV | RPKGD   | KMRDEL       | 405    |     |
| GacHSP47_1 | 363 | LTNPRLFYADHPP       | VFLVKDN | NKTNS  | ILYIGRVV | KPKGE   | KMRDEL       | 405    |     |
| GmoHSP47_1 | 364 | LRNPRLFYVDHPP       | IFLVKDN | KS     | GAIMYIG  | RMVKNP  | GD           | KMRDEL |     |
| OlaHSP47_1 | 363 | LRNPCLFYVDHPP       | IFLVKDN | NKTNS  | ILYIGRVV | RPKGE   | KMRDEL       | 405    |     |
| OniHSP47_1 | 363 | LRNPCLFYVDHPP       | IFLVKDN | NKTNS  | ILYIGRVV | KPKGE   | KMRDEL       | 405    |     |
| PfoHSP47_1 | 363 | LRNPCLFYVDHPP       | IFLVKDN | NKTNS  | ILYIGRVV | RPKGD   | KMRDEL       | 405    |     |
| TruHSP47_1 | 375 | LKNPKLFYVDHPP       | IFLVKDN | NKTNS  | IMYIGRVV | KPKGE   | KMRDEL       | 417    |     |
| XmaHSP47_1 | 363 | LKNPKLFYVDHPP       | IFLVKDN | NKTNS  | ILYIGRVV | RPKGD   | KMRDEL       | 405    |     |
| DreHSP47_2 | 361 | LKNPKLFYADHPP       | VFLVKDN | NKTNS  | ILFMGR   | LIRPKG  | DKMRDEL      | 403    |     |
| OniHSP47_2 | 368 | LKNPKLFYADHPP       | IFLVKD  | QKTSS  | ILFIGRM  | VRPKGE  | KMRDEL       | 410    |     |
| GmoHSP47_2 | 368 | LKNPKLFYADHPP       | IFLVKDL | KTTS   | ILYMG    | RMVRPKG | DKIRDEL      | 410    |     |
| XmaHSP47_2 | 368 | LKNPKLFYADHPP       | IFLIKDK | KTNS   | ILFIGRM  | VRPKGE  | KMRDEL       | 410    |     |
| GacHSP47_2 | 368 | LKDPKLFYADHPP       | IFLVKD  | QKTNS  | ILFIGRM  | VRPKGD  | KMKDEL       | 410    |     |
| PfoHSP47_2 | 369 | LKTPKLFYADHPP       | VFFIKDK | KTNS   | ILFIGRM  | VRPKGE  | KMRDEL       | 411    |     |
| AmeHSP47_2 | 361 | LKNPKLFYADHPP       | IFLVKDN | KTTS   | ILYIGRLV | RPKGD   | KMRDEL       | 403    |     |
| LocHSP47_2 | 364 | MRSKLFYVDHPP        | IFLIQDK | KTNS   | ILYIGRLV | KPNG    | DGNHDEL      | 406    |     |
| AmeHSP47_3 | 376 | LDKPKLFYADHS        | FVILV   | KENST  | GALVLL   | GALDMAE | GAALHDEL     | 418    |     |
| DreHSP47_3 | 372 | VKKPKLFYADHS        | FILV    | RDNST  | GALM     | GALDHTD | GP           | AIHDEL |     |
| OniHSP47_3 | 384 | IDRPKLFYADHPP       | IFLVRD  | SATGAL | LLMGAL   | DHAE    | GEPLHDEL     | 426    |     |
| OlaHSP47_2 | 335 | VGRPCLFYADHPP       | FLVLRD  | NATGAL | LLMGAL   | DHAE    | GELLHDEL     | 377    |     |
| TruHSP47_2 | 376 | IEKPKLFYADHPP       | VFLVRD  | NATGAL | LLMGAL   | DHVE    | GEAVHDEL     | 418    |     |
| TniHSP47   | 61  | IEAPKLFYADHPP       | VFLVRD  | NATGAL | LLMGAL   | DHVE    | GEAVHDEL     | 103    |     |
| XmaHSP47_3 | 375 | IERPKLFYADHPP       | IICV    | RDN    | TGAL     | LLMGAL  | DNVEGD       | LLHDEL |     |
| LocHSP47_3 | 359 | LQNTRLFYADHPP       | VLLVRD  | NOTGAL | LLMGAL   | DNA     | QGSALHDEL    | 401    |     |
| PfoHSP47_3 | 366 | TERPKLFYADHPP       | IVFVRD  | DTT    | GAL      | LLMGAL  | DNVEGELLHDEL | 408    |     |
| PfoHSP47_4 | 314 | -----QVGAPMLAA----- |         |        |          |         |              |        | 322 |
| PmaHSP47   | 393 | MRNPRLFYVDHPP       | FFLVRD  | ARSGAT | LLIGRC   | MRPM    | SGRHDEL      | 435    |     |
| LjaHSP47   | 428 | MRNPRLFYVDHPP       | FFLVRD  | ARSGAT | LLIGRC   | MRPV    | SGRHDEL      | 470    |     |

====> ==> ==s4B==> =====s5B==>

s1C

Motif 3

**Fig S3. Summary of sequence analyses of different HSP47/SERPINH1.**

A. Set I-III of HSP47/SERPINH1 shares different sequence identity ranges with HsaHSP47/SERPINH1. It hints for recent duplication of sets I and II being very close and set III being diverged.

B. Sequence logo of the reactive center loops of three sets of HSP47/SERPINH1 depicts non-inhibitory nature and differences with loss of two residues in the set III.

C. The C-terminal ends of different HSP47/SERPINH1 proteins depicts that ER-retention signal has different in the set III with R being replaced by H.

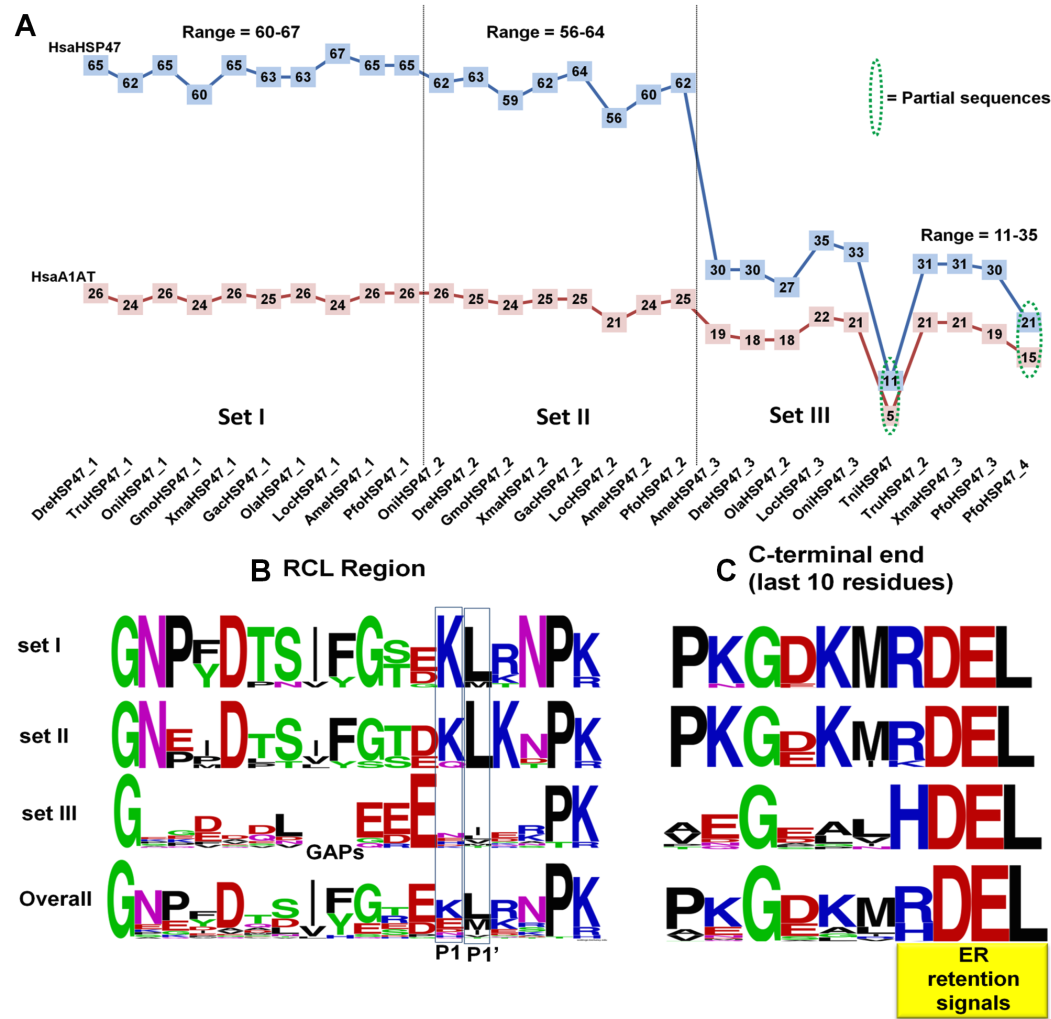



**Table S1. Overview of HSP47 genes from 61 vertebrate genomes, their assemblies and genomic localization.**

| Species                           | Genome assembly                   | Accession id        | Genomic localization                     |
|-----------------------------------|-----------------------------------|---------------------|------------------------------------------|
| <i>Ailuropoda melanoleuca</i>     | ailMel1 (GCA_000004335.1)         | ENSAMEG00000017004  | Scaffold GL192425.1: 1,119,608-1,124,040 |
| <i>Anas platyrhynchos</i>         | BGI_duck_1.0 (GCA_000355885.1)    | ENSAPLG00000014348  | Scaffold KB743381.1: 113,502-116,434     |
| <i>Anolis carolinensis</i>        | AnoCar2.0 (GCA_000090745.1)       | ENSACAG00000002229  | Scaffold GL343298.1: 714,401-718,931     |
| <i>Astyanax mexicanus</i>         | AstMex102 (GCA_000372685.1)       | ENSAMXG00000000056  | Scaffold KB871604.1: 223,363-229,678     |
| <i>Astyanax mexicanus</i>         | AstMex102 (GCA_000372685.1)       | ENSAMXG00000006432  | Scaffold KB882085.1: 1,768,034-1,776,194 |
| <i>Astyanax mexicanus</i>         | AstMex102 (GCA_000372685.1)       | ENSAMXG00000003269  | Scaffold KB882131.1: 359,489-395,080     |
| <i>Bos taurus</i>                 | UMD3.1 (GCA_000003055.3)          | ENSBTAG00000001027  | Chromosome 15: 55,514,945-55,525,175     |
| <i>Callithrix jacchus</i>         | C_jacchus3.2.1 (GCA_000004665.1)  | ENSCJAG00000015377  | Chromosome 11: 63,119,525-63,130,780     |
| <i>Canis lupus familiaris</i>     | CanFam3.1 (GCA_000002285.2)       | ENSCAFG00000005386  | Chromosome 21: 23,033,455-23,042,446     |
| <i>Cavia porcellus</i>            | cavPor3                           | ENSCPOG00000022994  | scaffold_103: 114,481-117,787            |
| <i>Chlorocebus sabaesus</i>       | ChlSab1.1 (GCA_000409795.2)       | ENSCSAG00000003909  | Chromosome 1: 66,788,240-66,799,072      |
| <i>Danio rerio</i>                | Zv9 (GCA_000002035.2)             | ENSDARG00000019949  | Chromosome 15: 28,732,298-28,736,597     |
| <i>Danio rerio</i>                | Zv9 (GCA_000002035.2)             | ENSDARG00000075954  | Chromosome 10: 39,878,541-39,887,981     |
| <i>Danio rerio</i>                | Zv9 (GCA_000002035.2)             | ENSDARG000000036445 | Chromosome 7: 22,441,345-22,478,600      |
| <i>Dasypus novemcinctus</i>       | Dasnov3.0 (GCA_000208655.2)       | ENSDNOG00000019034  | Scaffold JH568609.1: 111,384-121,357     |
| <i>Dipodomys ordii</i>            | dipOrd1                           | ENSDORG00000002978  | GeneScaffold_4955: 160,144-165,399       |
| <i>Echinops telfairi</i>          | TENREC                            | ENSETEG00000017520  | scaffold_303682: 3,151-7,601             |
| <i>Equus caballus</i>             | Equ_Cab_2 (GCA_000002305.1)       | ENSECAG00000004871  | Chromosome 7: 68,605,995-68,611,500      |
| <i>Erinaceus europaeus</i>        | eriEur1                           | ENSEEUG00000003946  | GeneScaffold_511: 19,319-22,838          |
| <i>Felis catus</i>                | Felis_catus_6.2 (GCA_000181335.2) | ENSFCAG00000011944  | Chromosome D1: 59,000,253-59,009,974     |
| <i>Ficedula albicollis</i>        | FicAlb_1.4 (GCA_000247815.1)      | ENSFALG00000006601  | Scaffold JH603425.1: 18,154-20,583       |
| <i>Gadus morhua</i>               | gadMor1 (GCA_000231765.1)         | ENSGMOG00000001309  | GeneScaffold_1352: 269,125-271,324       |
| <i>Gadus morhua</i>               | gadMor1 (GCA_000231765.1)         | ENSGMOG00000007382  | GeneScaffold_4231: 9,838-13,332          |
| <i>Gallus gallus</i>              | Galgal4 (GCA_000002315.2)         | ENSGALG00000011214  | Chromosome 1: 194,288,921-194,295,617    |
| <i>Gasterosteus aculeatus</i>     | BROADS1                           | ENSGACG00000006375  | groupI: 3,124,210-3,127,693              |
| <i>Gasterosteus aculeatus</i>     | BROADS1                           | ENSGACG000000020152 | groupVII: 12,211,634-12,215,855          |
| <i>Gorilla gorilla gorilla</i>    | gorGor3.1 (GCA_000151905.1)       | ENSGGOG00000005397  | Chromosome 11: 72,594,231-72,604,934     |
| <i>Homo sapiens</i>               | GRCh37 (GCA_000001405.13)         | ENSG00000149257     | Chromosome 11: 75,273,101-75,283,828     |
| <i>Ictidomys tridecemlineatus</i> | spetri2 (GCA_000236235.1)         | ENSSTOG00000027738  | Scaffold JH393308.1: 4,265,158-4,350,937 |
| <i>Latimeria chalumnae</i>        | LatCha1 (GCA_000225785.1)         | ENSLACG00000006746  | Scaffold JH129193.1: 234,078-249,245     |

|                               |                                          |                     |                                          |
|-------------------------------|------------------------------------------|---------------------|------------------------------------------|
| <i>Poecilia formosa</i>       | Poecilia_formosa-5.1.2 (GCA_000485575.1) | ENSPFOG00000013710  | Scaffold AYCK01029354.1: 5,404-12,214    |
| <i>Pongo abelii</i>           | PPYG2 (GCA_000001545.1)                  | ENSPPYG00000003691  | Chromosome 11: 71,005,958-71,015,006     |
| <i>Procapia capensis</i>      | proCap1                                  | ENSPCAG00000010663  | GeneScaffold_4297: 70,366-73,898         |
| <i>Pteropus vampyrus</i>      | pteVam1                                  | ENSPVAG00000011278  | GeneScaffold_1708: 259,301-263,374       |
| <i>Rattus norvegicus</i>      | Rnor_5.0 (GCA_000001895.3)               | ENSRNOG00000016831  | Chromosome 1: 170,503,596-170,510,775    |
| <i>Sarcophilus harrisii</i>   | Devil_ref v7.0 (GCA_000189315.1)         | ENSSHAG00000009364  | Scaffold GL849728.1: 535,612-545,598     |
| <i>Sus scrofa</i>             | Sscrofa10.2 (GCA_000003025.4)            | ENSSSCG00000014859  | Chromosome 9: 10,972,133-10,976,532      |
| <i>Taeniopygia guttata</i>    | taeGut3.2.4                              | ENSTGUG00000013481  | Chromosome 1: 99,126,385-99,128,353      |
| <i>Takifugu rubripes</i>      | FUGU4                                    | ENSTRUG00000001559  | scaffold_131: 112,128-113,986            |
| <i>Takifugu rubripes</i>      | FUGU4                                    | ENSTRUG00000004704  | Scaffold_186: 231,121-242,595            |
| <i>Tarsius syrichta</i>       | tarSyr1                                  | ENSTSYG00000007354  | GeneScaffold_4812: 539-2,737             |
| <i>Tetraodon nigroviridis</i> | TETRAODON8                               | ENSTNIG00000004097  | Chromosome Un_random: 493,910-494,221    |
| <i>Tupaia belangeri</i>       | tupBel1                                  | ENSTBEG00000001023  | GeneScaffold_3565: 125,861-130,281       |
| <i>Tursiops truncatus</i>     | turTru1                                  | ENSTTRG00000012009  | scaffold_112285: 165,941-171,301         |
| <i>Xenopus tropicalis</i>     | JGI 4.2 (GCA_000004195.1)                | ENSXETG00000010725  | Scaffold GL172913.1: 1,301,229-1,303,075 |
| <i>Xiphophorus maculatus</i>  | Xipmac4.4.2 (GCA_000241075.1)            | ENSXMAG00000001370  | Scaffold AGAJ01049567.1: 337-4,406       |
| <i>Xiphophorus maculatus</i>  | Xipmac4.4.2 (GCA_000241075.1)            | ENSXMAG000000014013 | Scaffold JH556831.1: 757,758-762,448     |
| <i>Xiphophorus maculatus</i>  | Xipmac4.4.2 (GCA_000241075.1)            | ENSXMAG000000013925 | Scaffold JH557141.1: 97,083-122,348      |

\*From webpage of the Japanese lamprey genome project (<http://jlampreygenome.imcb.a-star.edu.sg/>)



|                              |                                          |                    |                                               |
|------------------------------|------------------------------------------|--------------------|-----------------------------------------------|
| <i>Lepisosteus oculatus</i>  | LepOcu1 (GCA_000242695.1)                | ENSLOC00000000987  | Chromosome LG3: 474,771-481,123               |
| <i>Lepisosteus oculatus</i>  | LepOcu1 (GCA_000242695.1)                | ENSLOC00000014734  | Chromosome LG7: 41,901,506-41,905,696         |
| <i>Lepisosteus oculatus</i>  | LepOcu1 (GCA_000242695.1)                | ENSLOC00000013424  | Chromosome LG2: 58,538,944-58,547,367         |
| <i>Lethenteron japonicum</i> | LetJap1.0 (APJL00000000.1)               | JL8319             | Scaffold00131: 1482314-1484962                |
| <i>Loxodonta africana</i>    | Loxafr3.0 (GCA_000001905.1)              | ENSLAFG00000003780 | SuperContig scaffold_79: 1,878,003-1,881,599  |
| <i>Macaca mulatta</i>        | MMUL 1.0                                 | ENSMUG00000007675  | Chromosome 14: 73,742,253-73,752,788          |
| <i>Macropus eugenii</i>      | Meug_1.0 (GCA_000004035.1)               | ENSMEUG00000008709 | GeneScaffold_5800: 3,692-18,612               |
| <i>Meleagris gallopavo</i>   | UMD2 (GCA_000146605.1)                   | ENSMGAG00000015291 | Chromosome 1: 203,021,087-203,026,274         |
| <i>Microcebus murinus</i>    | micMur1                                  | ENSMICG00000015249 | GeneScaffold_2542: 23,359-28,326              |
| <i>Monodelphis domestica</i> | monDom5 (GCF_000002295.2)                | ENSMODG00000006814 | Chromosome 4: 342,820,867-342,826,459         |
| <i>Mus musculus</i>          | GRCm38 (GCA_000001635.3)                 | ENSMUSG00000070436 | Chromosome 7: 99,345,375-99,353,230           |
| <i>Mustela putorius furo</i> | MusPutFur1.0 (GCA_000215625.1)           | ENSMPUG00000009062 | Scaffold GL897030.1: 1,507,718-1,515,757      |
| <i>Myotis lucifugus</i>      | Myoluc2.0 (GCA_000147115.1)              | ENSMUG00000004105  | Scaffold GL430204: 307,832-312,479            |
| <i>Nomascus leucogenys</i>   | Nleu1.0 (GCA_000146795.1)                | ENSNLEG00000016882 | SuperContig GL397264.1: 14,732,258-14,742,905 |
| <i>Ochotona princeps</i>     | OchPri2.0                                | ENSOPRG00000007518 | GeneScaffold_3741: 324,406-328,787            |
| <i>Oreochromis niloticus</i> | Orenil1.0 (GCA_000188235.1)              | ENSONIG00000005220 | Scaffold GL831147.1: 2,758,965-2,761,367      |
| <i>Oreochromis niloticus</i> | Orenil1.0 (GCA_000188235.1)              | ENSONIG00000015878 | Scaffold GL831214.1: 2,676,278-2,680,779      |
| <i>Oreochromis niloticus</i> | Orenil1.0 (GCA_000188235.1)              | ENSONIG00000019907 | Scaffold GL831388.1: 444,615-464,598          |
| <i>Oryctolagus cuniculus</i> | OryCun2.0 (GCA_000003625.1)              | ENSOCUG00000026029 | Chromosome 1: 141,174,524-141,175,285         |
| <i>Oryzias latipes</i>       | MEDAKA1                                  | ENSORLG00000014312 | Chromosome 13: 27,993,919-27,996,591          |
| <i>Oryzias latipes</i>       | MEDAKA1                                  | ENSORLT00000004598 | Chromosome 18: 5,866,958-5,900,935            |
| <i>Otolemur garnettii</i>    | OtoGar3 (GCA_000181295.3)                | ENSOGAG00000032244 | Scaffold GL873520.1: 26,857,182-26,863,215    |
| <i>Ovis aries</i>            | Oar_v3.1 (GCA_000298735.1)               | ENSOARG00000011824 | Chromosome 15: 52,925,655-52,931,691          |
| <i>Pan troglodytes</i>       | CHIMP2.1.4 (GCA_000001515.4)             | ENSPTRG00000004083 | Chromosome 11: 73,325,614-73,336,379          |
| <i>Papio anubis</i>          | PapAnu2.0 (GCA_000264685.1)              | ENSPANG00000015277 | Chromosome 14: 65,410,443-65,424,007          |
| <i>Pelodiscus sinensis</i>   | PelSin_1.0 (GCA_000230535.1)             | ENSPSIG00000008216 | Scaffold JH210954.1: 315,916-321,989          |
| <i>Petromyzon Marinus</i>    | Pmarinus_7.0 (GCA_000148955.1)           | ENSPMAG00000007485 | Scaffold GL481971: 179,843-181,907            |
| <i>Poecilia formosa</i>      | Poecilia_formosa-5.1.2 (GCA_000485575.1) | ENSPFOG00000005984 | Scaffold KI519751.1: 1,375,174-1,379,276      |
| <i>Poecilia formosa</i>      | Poecilia_formosa-5.1.2 (GCA_000485575.1) | ENSPFOG00000001716 | Scaffold KI520426.1: 60,059-64,596            |
| <i>Poecilia formosa</i>      | Poecilia_formosa-5.1.2 (GCA_000485575.1) | ENSPFOG00000001241 | Scaffold KI519773.1: 208,366-229,202          |

**Table S2. Summary of 15 genes flanking on the each side of Human HSP47.**

| Gene          | Description                                                                                                       | Chromosomal Location                | Strand      |
|---------------|-------------------------------------------------------------------------------------------------------------------|-------------------------------------|-------------|
| KCNE3         | potassium channel, voltage gated subfamily E regulatory beta subunit 3                                            | 11 : 74,454,841 - 74,467,729        | minus       |
| LIPT2         | lipoyl(octanoyl) transferase 2 (putative)                                                                         | 11 : 74,491,712 - 74,493,733        | minus       |
| POLD3         | polymerase (DNA-directed), delta 3, accessory subunit                                                             | 11 : 74,493,851 - 74,669,117        | plus        |
| CHRD2         | chordin-like 2                                                                                                    | 11 : 74,696,429 - 74,731,385        | minus       |
| RNF169        | ring finger protein 169                                                                                           | 11 : 74,748,868 - 74,842,413        | plus        |
| XRRA1         | X-ray radiation resistance associated 1                                                                           | 11 : 74,807,739 - 74,949,200        | minus       |
| SPCS2         | signal peptidase complex subunit 2 homolog ( <i>S. cerevisiae</i> )                                               | 11 : 74,949,247 - 74,979,031        | plus        |
| NEU3          | sialidase 3 (membrane sialidase)                                                                                  | 11 : 74,988,134 - 75,018,893        | plus        |
| OR2AT4        | olfactory receptor, family 2, subfamily AT, member 4                                                              | 11 : 75,088,713 - 75,089,754        | minus       |
| SLCO2B1       | solute carrier organic anion transporter family, member 2B1                                                       | 11 : 75,100,563 - 75,206,549        | plus        |
| TPBGL         | trophoblast glycoprotein-like                                                                                     | 11 : 75,240,905 - 75,243,697        | plus        |
| ARRB1         | <i>arrestin, beta 1</i>                                                                                           | 11 : 75,264,182 - 75,351,705        | minus       |
| RPS3          | <i>ribosomal protein S3</i>                                                                                       | 11 : 75,399,486 - 75,422,280        | plus        |
| KLHL35        | <i>kelch-like family member 35</i>                                                                                | 11 : 75,422,394 - 75,430,629        | minus       |
| GDPD5         | <i>glycerophosphodiester phosphodiesterase domain containing 5</i>                                                | 11 : 75,434,640 - 75,525,903        | minus       |
| <b>HSP47</b>  | <b>Heat Shock protein 47 kDa, HSP47, SERPINH1</b>                                                                 | <b>11 : 75,562,056 - 75,572,783</b> | <b>plus</b> |
| MAP6          | <i>microtubule-associated protein 6</i>                                                                           | 11 : 75,586,918 - 75,669,120        | minus       |
| MOGAT2        | <i>monoacylglycerol O-acyltransferase 2</i>                                                                       | 11 : 75,717,819 - 75,732,958        | plus        |
| DGAT2         | <i>diacylglycerol O-acyltransferase 2</i>                                                                         | 11 : 75,759,512 - 75,801,535        | plus        |
| UVRAG         | <i>UV radiation resistance associated</i>                                                                         | 11 : 75,815,167 - 76,143,195        | plus        |
| WNT11         | <i>wingless-type MMTV integration site family, member 11</i>                                                      | 11 : 76,186,325 - 76,210,736        | minus       |
| PRKRIR        | <i>protein-kinase, interferon-inducible double stranded RNA dependent inhibitor, repressor of (P58 repressor)</i> | 11 : 76,349,956 - 76,380,971        | minus       |
| RP11-111M22.2 | RP11-111M22.2                                                                                                     | 11 : 76,381,313 - 76,414,619        | plus        |
| C11orf30      | chromosome 11 open reading frame 30                                                                               | 11 : 76,444,923 - 76,553,025        | plus        |
| LRRC32        | <i>leucine rich repeat containing 32</i>                                                                          | 11 : 76,657,524 - 76,670,747        | minus       |

|               |                                                                      |                                     |             |
|---------------|----------------------------------------------------------------------|-------------------------------------|-------------|
| <i>TSKU</i>   | <i>tsukushi, small leucine rich proteoglycan</i>                     | <i>11 : 76,782,251 - 76,798,154</i> | <i>plus</i> |
| <i>ACER3</i>  | <i>alkaline ceramidase 3</i>                                         | <i>11 : 76,860,867 - 77,026,797</i> | <i>plus</i> |
| <i>B3GNT6</i> | <i>UDP-GlcNAc:betaGal beta-1,3-N-acetylglucosaminyltransferase 6</i> | <i>11 : 77,034,398 - 77,041,973</i> | <i>plus</i> |
| <i>CAPN5</i>  | <i>calpain 5</i>                                                     | <i>11 : 77,066,932 - 77,126,155</i> | <i>plus</i> |
| <i>OMP</i>    | <i>olfactory marker protein</i>                                      | <i>11 : 77,102,840 - 77,103,331</i> | <i>plus</i> |
| <i>MYO7A</i>  | <i>myosin VIIA</i>                                                   | <i>11 : 77,128,264 - 77,215,239</i> | <i>plus</i> |
|               |                                                                      |                                     |             |

**Table S3. Detailed overview of gene annotation for the flanking genes on the ancestral locus of HSP47/SERPINH1 on the scaffold00131 from Japanese lamprey genome,** A total 45 genes are residing on this locus of size 1 Mb. The gene g32.t1 is LjaHSP47/SERPINH1 and the g19.t1 is P2RY6-like GPCR (also known as lysophosphatic acid receptor, LPA6R) and these two genes are conserved in several vertebrate genomes (**Fig. 3**) and hence marked in red color. Gene annotation was performed using BLAST2GO 3.0 [8] and INTERPRO ([www.ebi.ac.uk/interpro](http://www.ebi.ac.uk/interpro)).

| Gene ID      | Gene Annotation               | Protein Length | e-Value  | sim mean | #GO | GO Names list                                                                                                                                                                                                                                                                                                                                                                                                                                                                                                                                                                                            | Enzyme Codes list | InterPro IDs                                                                                                                              |
|--------------|-------------------------------|----------------|----------|----------|-----|----------------------------------------------------------------------------------------------------------------------------------------------------------------------------------------------------------------------------------------------------------------------------------------------------------------------------------------------------------------------------------------------------------------------------------------------------------------------------------------------------------------------------------------------------------------------------------------------------------|-------------------|-------------------------------------------------------------------------------------------------------------------------------------------|
| <b>g1.t1</b> | diacylglycerol kinase partial | 99             | 5,40E-57 | 96%      | 22  | C:cytosol; C:cytoskeleton; C:plasma membrane; C:cytoplasmic membrane-bounded vesicle; C:nuclear speck; F:diacylglycerol kinase activity; F:ATP binding; F:kinase binding; F:activating transcription factor binding; F:protein homodimerization activity; F:phospholipase binding; F:metal ion binding; F:protein heterodimerization activity; P:regulation of transcription from RNA polymerase II promoter; P:protein kinase C-activating G-protein coupled receptor signaling pathway; P:phosphorylation; P:cAMP-mediated signaling; P:response to ATP; P:diacylglycerol metabolic process; P:protein | EC:2.7.1.10<br>7  | IPR001206 (SMART); IPR001206 (PFAM); PTHR11255 (PANTHER); PTHR11255:SF30 (PANTHER); IPR001206 (PROSITE_PROFILES); IPR016064 (SUPERFAMILY) |

|              |                                                          |     |          |         |   |                                                                                                                                                                                            |            |                                                                                                                                                                                                                                                                                                                                      |
|--------------|----------------------------------------------------------|-----|----------|---------|---|--------------------------------------------------------------------------------------------------------------------------------------------------------------------------------------------|------------|--------------------------------------------------------------------------------------------------------------------------------------------------------------------------------------------------------------------------------------------------------------------------------------------------------------------------------------|
|              |                                                          |     |          |         |   | homooligomerization; P:thrombin receptor signaling pathway; P:protein kinase C signaling                                                                                                   |            |                                                                                                                                                                                                                                                                                                                                      |
| <b>g2.t1</b> | ---NA---                                                 | 109 | -        | -       | - |                                                                                                                                                                                            | -          | CYTOPLASMIC_DOMAIN (PHOBIUS); NON_CYTOPLASMIC_DOMAIN (PHOBIUS); TRANSMEMBRANE (PHOBIUS); TRANSMEMBRANE (PHOBIUS); CYTOPLASMIC_DOMAIN (PHOBIUS); NON_CYTOPLASMIC_DOMAIN (PHOBIUS); CYTOPLASMIC_DOMAIN (PHOBIUS); TRANSMEMBRANE (PHOBIUS); TRANSMEMBRANE (PHOBIUS); TMhelix (TMHMM); TMhelix (TMHMM); TMhelix (TMHMM); TMhelix (TMHMM) |
| <b>g3.t1</b> | ---NA---                                                 | 108 | -        | -       | - |                                                                                                                                                                                            | -          | Coil (COILS)                                                                                                                                                                                                                                                                                                                         |
| <b>g4.t1</b> | phosphatidylinositol-glycan biosynthesis class f protein | 207 | 2,10E-33 | 76,05 % | 5 | C:endoplasmic reticulum membrane; C:integral component of membrane; F:ethanolaminephosphotransferase activity; P:C-terminal protein lipidation; P:preassembly of GPI anchor in ER membrane | EC:2.7.8.1 | IPR009580 (PFAM); IPR009580 (PANTHER); SIGNAL_PEPTIDE (PHOBIUS); TRANSMEMBRANE (PHOBIUS); NON_CYTOPLASMIC_DOMAIN (PHOBIUS); CYTOPLASMIC_DOMAIN (PHOBIUS); CYTOPLASMIC_DOMAIN (PHOBIUS); TRANSMEMBRANE                                                                                                                                |

|              |                                                    |     |              |            |    |                                                                                                                                                                                 |                                                                                                                                                                                                                                                                                                                                                                                                                                     |
|--------------|----------------------------------------------------|-----|--------------|------------|----|---------------------------------------------------------------------------------------------------------------------------------------------------------------------------------|-------------------------------------------------------------------------------------------------------------------------------------------------------------------------------------------------------------------------------------------------------------------------------------------------------------------------------------------------------------------------------------------------------------------------------------|
|              |                                                    |     |              |            |    |                                                                                                                                                                                 | (PHOBIUS);<br>SIGNAL_PEPTIDE_N_REGION<br>(PHOBIUS);<br>NON_CYTOPLASMIC_DOMAIN<br>(PHOBIUS);<br>SIGNAL_PEPTIDE_H_REGION<br>(PHOBIUS); TRANSMEMBRANE<br>(PHOBIUS);<br>SIGNAL_PEPTIDE_C_REGION<br>(PHOBIUS); TMhelix (TMHMM);<br>TMhelix (TMHMM); TMhelix<br>(TMHMM); TMhelix (TMHMM)                                                                                                                                                  |
| <b>g5.t1</b> | ovotransferrin-like                                | 794 | 0,00E+0<br>0 | 58,80<br>% | 7  | C:extracellular space;<br>C:intracellular; F:GTP binding;<br>F:metal ion binding; P:ion<br>transport; P:small GTPase mediated<br>signal transduction; P:iron ion<br>homeostasis | -<br>IPR001156 (PRINTS); IPR001156<br>(SMART); IPR001156 (PFAM);<br>G3DSA:3.40.190.10 (GENE3D);<br>G3DSA:3.40.190.10 (GENE3D);<br>IPR016357 (PIRSF);<br>G3DSA:3.40.190.10 (GENE3D);<br>G3DSA:3.40.190.10 (GENE3D);<br>PTHR11485 (PANTHER); IPR018195<br>(PROSITE_PATTERNS); IPR018195<br>(PROSITE_PATTERNS); IPR001156<br>(PROSITE_PROFILES); IPR001156<br>(PROSITE_PROFILES); SSF53850<br>(SUPERFAMILY); SSF53850<br>(SUPERFAMILY) |
| <b>g6.t1</b> | conserved<br>oligomeric golgi<br>complex subunit 3 | 913 | 0,00E+0<br>0 | 74,25<br>% | 13 | C:nucleoplasm; C:cis-Golgi network;<br>C:plasma membrane; C:Golgi<br>transport complex; F:protein<br>transporter activity; P:retrograde                                         | -<br>-                                                                                                                                                                                                                                                                                                                                                                                                                              |

|              |                              |     |          |         |   |                                                                                                                                                                                                                                                                                           |   |                                                                                                                                                                                                                                                                                                                                                                                                      |
|--------------|------------------------------|-----|----------|---------|---|-------------------------------------------------------------------------------------------------------------------------------------------------------------------------------------------------------------------------------------------------------------------------------------------|---|------------------------------------------------------------------------------------------------------------------------------------------------------------------------------------------------------------------------------------------------------------------------------------------------------------------------------------------------------------------------------------------------------|
|              |                              |     |          |         |   | transport, vesicle recycling within Golgi; P:protein glycosylation; P:intracellular protein transport; P:ER to Golgi vesicle-mediated transport; P:retrograde vesicle-mediated transport, Golgi to ER; P:Golgi organization; P:protein localization to organelle; P:protein stabilization |   |                                                                                                                                                                                                                                                                                                                                                                                                      |
| <b>g7.t1</b> | hypothetical chloroplast rf2 | 813 | 2,70E-18 | 50,30 % | 6 | C:microtubule; C:chloroplast stroma; F:calmodulin binding; F:ATP binding; F:microtubule binding; P:microtubule cytoskeleton organization                                                                                                                                                  | - | Coil (COILS); IPR029281 (PFAM); TRANSMEMBRANE (PHOBIUS); NON_CYTOPLASMIC_DOMAIN (PHOBIUS); TRANSMEMBRANE (PHOBIUS); TRANSMEMBRANE (PHOBIUS); TRANSMEMBRANE (PHOBIUS); CYTOPLASMIC_DOMAIN (PHOBIUS); CYTOPLASMIC_DOMAIN (PHOBIUS); CYTOPLASMIC_DOMAIN (PHOBIUS); NON_CYTOPLASMIC_DOMAIN (PHOBIUS); IPR011044 (SUPERFAMILY); SSF58113 (SUPERFAMILY); TMhelix (TMHMM); TMhelix (TMHMM); TMhelix (TMHMM) |
| <b>g8.t1</b> | glypican- partial            | 202 | 3,80E-07 | 68,55 % | 4 | C:proteinaceous extracellular matrix; C:plasma membrane;                                                                                                                                                                                                                                  | - | IPR001863 (PFAM); IPR001863 (PANTHER); IPR031188                                                                                                                                                                                                                                                                                                                                                     |

|               |                                                                           |     |           |         |   |                                                                                                                                                                                      |   |                                                                                                                                                                                          |
|---------------|---------------------------------------------------------------------------|-----|-----------|---------|---|--------------------------------------------------------------------------------------------------------------------------------------------------------------------------------------|---|------------------------------------------------------------------------------------------------------------------------------------------------------------------------------------------|
|               |                                                                           |     |           |         |   | C:anchored component of membrane; F:heparan sulfate proteoglycan binding                                                                                                             |   | (PTHR10822:PANTHER)                                                                                                                                                                      |
| <b>g9.t1</b>  | glypican-5 isoform x25                                                    | 537 | 1,40E-101 | 60,35 % | 4 | C:proteinaceous extracellular matrix; C:plasma membrane; C:anchored component of membrane; F:heparan sulfate proteoglycan binding                                                    | - | IPR001863 (PFAM); IPR031188 (PANTHER); IPR001863 (PANTHER); IPR001863 (PANTHER)                                                                                                          |
| <b>g10.t1</b> | endoplasmic reticulum-golgi intermediate compartment protein partial      | 161 | 1,20E-86  | 88,15 % | 5 | C:endoplasmic reticulum membrane; C:Golgi apparatus; C:integral component of membrane; C:endoplasmic reticulum-Golgi intermediate compartment membrane; P:vesicle-mediated transport | - | IPR012936 (PFAM); PTHR10984 (PANTHER); NON_CYTOPLASMIC_DOMAIN (PHOBIUS); TRANSMEMBRANE (PHOBIUS); CYTOPLASMIC_DOMAIN (PHOBIUS); TMhelix (TMHMM)                                          |
| <b>g11.t1</b> | endoplasmic reticulum-golgi intermediate compartment protein 3 isoform x1 | 266 | 2,50E-89  | 76,95 % | 5 | C:endoplasmic reticulum membrane; C:Golgi apparatus; C:integral component of membrane; C:endoplasmic reticulum-Golgi intermediate compartment membrane; P:vesicle-mediated transport | - | PF13850 (PFAM); IPR012936 (PFAM); PTHR10984 (PANTHER); PTHR10984:SF25 (PANTHER)                                                                                                          |
| <b>g12.t1</b> | progesterone and adiponectin receptor family member 9                     | 354 | 4,10E-74  | 59,30 % | 2 | C:integral component of membrane; F:receptor activity                                                                                                                                | - | IPR004254 (PFAM); PTHR20855:SF29 (PANTHER); PTHR20855:SF29 (PANTHER); IPR004254 (PANTHER); IPR004254 (PANTHER); TRANSMEMBRANE (PHOBIUS); TRANSMEMBRANE (PHOBIUS); NON_CYTOPLASMIC_DOMAIN |



|                    |                                 |     |          |            |   |                                                                 |                                                                                                                                                                                                                                                                                                                                                                                                                                                                                                                                                     |
|--------------------|---------------------------------|-----|----------|------------|---|-----------------------------------------------------------------|-----------------------------------------------------------------------------------------------------------------------------------------------------------------------------------------------------------------------------------------------------------------------------------------------------------------------------------------------------------------------------------------------------------------------------------------------------------------------------------------------------------------------------------------------------|
|                    |                                 |     |          |            |   |                                                                 | (PHOBIUS); TRANSMEMBRANE (PHOBIUS); TRANSMEMBRANE (PHOBIUS); TRANSMEMBRANE (PHOBIUS); NON_CYTOPLASMIC_DOMAIN (PHOBIUS); NON_CYTOPLASMIC_DOMAIN (PHOBIUS); CYTOPLASMIC_DOMAIN (PHOBIUS); NON_CYTOPLASMIC_DOMAIN (PHOBIUS); TRANSMEMBRANE (PHOBIUS); CYTOPLASMIC_DOMAIN (PHOBIUS); TRANSMEMBRANE (PHOBIUS); CYTOPLASMIC_DOMAIN (PHOBIUS); TRANSMEMBRANE (PHOBIUS); CYTOPLASMIC_DOMAIN (PHOBIUS); CYTOPLASMIC_DOMAIN (PHOBIUS); TMhelix (TMHMM); |
| <b>g13.t<br/>1</b> | procollagen c-<br>endopeptidase | 389 | 3,10E-64 | 52,75<br>% | 5 | C:extracellular exosome; F:collagen binding; F:heparin binding; | -<br>IPR000859 (SMART);<br>G3DSA:2.40.50.120 (GENE3D);                                                                                                                                                                                                                                                                                                                                                                                                                                                                                              |

|                          |                                              |     |          |         |    |                                                                                                                                                                                                                                      |   |                                                                                                                                                                                                                                                                                                                                                                                                                                                                                                                                             |
|--------------------------|----------------------------------------------|-----|----------|---------|----|--------------------------------------------------------------------------------------------------------------------------------------------------------------------------------------------------------------------------------------|---|---------------------------------------------------------------------------------------------------------------------------------------------------------------------------------------------------------------------------------------------------------------------------------------------------------------------------------------------------------------------------------------------------------------------------------------------------------------------------------------------------------------------------------------------|
|                          | enhancer 2                                   |     |          |         |    | F:peptidase activator activity;<br>P:positive regulation of peptidase activity                                                                                                                                                       |   | IPR000859 (G3DSA:2.60.120.GENE3D); IPR000859 (PFAM); IPR000859 (G3DSA:2.60.120.GENE3D); PTHR10127:SF40 (PANTHER); PTHR10127 (PANTHER); PTHR10127:SF40 (PANTHER); PTHR10127 (PANTHER); NON_CYTOPLASMIC_DOMAIN (PHOBIUS); SIGNAL_PEPTIDE_N_REGION (PHOBIUS); SIGNAL_PEPTIDE_C_REGION (PHOBIUS); SIGNAL_PEPTIDE (PHOBIUS); SIGNAL_PEPTIDE_H_REGION (PHOBIUS); IPR000859 (PROSITE_PROFILES); IPR000859 (PROSITE_PROFILES); SignalP-TM (SIGNALP_EUK); IPR008993 (SUPERFAMILY); IPR000859 (SUPERFAMILY); IPR000859 (SUPERFAMILY); TMhelix (TMHMM) |
| <b>g14.t</b><br><b>1</b> | short transient receptor potential channel 1 | 497 | 0,00E+00 | 84,20 % | 16 | C:cytosol; C:integral component of plasma membrane; C:basolateral plasma membrane; C:sarcomere; C:costamere; C:receptor complex; C:membrane raft; F:store-operated calcium channel activity; F:ion channel binding; F:inositol 1,4,5 | - | IPR002153 (PRINTS); IPR005457 (PRINTS); IPR005821 (PFAM); IPR002153 (PANTHER); IPR005457 (PTHR10117:PANTHER); SIGNAL_PEPTIDE_H_REGION (PHOBIUS); TRANSMEMBRANE (PHOBIUS);                                                                                                                                                                                                                                                                                                                                                                   |

|  |  |  |  |  |                                                                                                                                                                                                                                                                  |                                                                                                                                                                                                                                                                                                                                                                                                                                                                                                                                                                                                                                                                                                   |
|--|--|--|--|--|------------------------------------------------------------------------------------------------------------------------------------------------------------------------------------------------------------------------------------------------------------------|---------------------------------------------------------------------------------------------------------------------------------------------------------------------------------------------------------------------------------------------------------------------------------------------------------------------------------------------------------------------------------------------------------------------------------------------------------------------------------------------------------------------------------------------------------------------------------------------------------------------------------------------------------------------------------------------------|
|  |  |  |  |  | <p>triphosphate binding;<br/> P:manganese ion transport; P:saliva secretion; P:positive regulation of release of sequestered calcium ion into cytosol; P:cytosolic calcium ion homeostasis; P:response to calcium ion; P:calcium ion transmembrane transport</p> | <p>NON_CYTOPLASMIC_DOMAIN (PHOBIUS);<br/> CYTOPLASMIC_DOMAIN (PHOBIUS);<br/> SIGNAL_PEPTIDE_C_REGION (PHOBIUS);<br/> NON_CYTOPLASMIC_DOMAIN (PHOBIUS);<br/> NON_CYTOPLASMIC_DOMAIN (PHOBIUS);<br/> TRANSMEMBRANE (PHOBIUS);<br/> TRANSMEMBRANE (PHOBIUS);<br/> TRANSMEMBRANE (PHOBIUS);<br/> TRANSMEMBRANE (PHOBIUS);<br/> TRANSMEMBRANE (PHOBIUS);<br/> NON_CYTOPLASMIC_DOMAIN (PHOBIUS);<br/> NON_CYTOPLASMIC_DOMAIN (PHOBIUS);<br/> CYTOPLASMIC_DOMAIN (PHOBIUS);<br/> SIGNAL_PEPTIDE_N_REGION (PHOBIUS);<br/> TRANSMEMBRANE (PHOBIUS);<br/> SIGNAL_PEPTIDE (PHOBIUS);<br/> CYTOPLASMIC_DOMAIN (PHOBIUS);<br/> CYTOPLASMIC_DOMAIN (PHOBIUS);<br/> TRANSMEMBRANE (PHOBIUS);<br/> SignalP-TM</p> |
|--|--|--|--|--|------------------------------------------------------------------------------------------------------------------------------------------------------------------------------------------------------------------------------------------------------------------|---------------------------------------------------------------------------------------------------------------------------------------------------------------------------------------------------------------------------------------------------------------------------------------------------------------------------------------------------------------------------------------------------------------------------------------------------------------------------------------------------------------------------------------------------------------------------------------------------------------------------------------------------------------------------------------------------|

|                    |                                                                           |     |          |         |   |                                                                                                                                            |   |                                                                                                                                                                                                |
|--------------------|---------------------------------------------------------------------------|-----|----------|---------|---|--------------------------------------------------------------------------------------------------------------------------------------------|---|------------------------------------------------------------------------------------------------------------------------------------------------------------------------------------------------|
|                    |                                                                           |     |          |         |   |                                                                                                                                            |   | (SIGNALP_EUK); TMhelix (TMHMM); TMhelix (TMHMM); TMhelix (TMHMM); TMhelix (TMHMM); TMhelix (TMHMM); TMhelix (TMHMM); TMhelix (TMHMM)                                                           |
| <b>g15.t<br/>1</b> | inhibitor of nuclear factor kappa-b kinase-interacting protein isoform x1 | 254 | 5,30E-04 | 47,44 % | 2 | C:endoplasmic reticulum membrane; C:integral component of membrane                                                                         | - | Coil (COILS)                                                                                                                                                                                   |
| <b>g16.t<br/>1</b> | ninein-like protein                                                       | 366 | 4,70E-12 | 48,70 % | 1 | F:calcium ion binding                                                                                                                      | - | Coil (COILS); Coil (COILS); PTHR18905 (PANTHER)                                                                                                                                                |
| <b>g17.t<br/>1</b> | nucleoredoxin-like protein 2                                              | 128 | 2,00E-15 | 55,45 % | 3 | P:visual perception; P:sensory perception of smell; P:photoreceptor cell maintenance                                                       | - | IPR012336 (PFAM); IPR012336 (G3DSA:3.40.30.GENE3D); IPR029519 (PTHR13871:PANTHER); PTHR13871 (PANTHER); IPR012336 (SUPERFAMILY)                                                                |
| <b>g18.t<br/>1</b> | ---NA---                                                                  | 169 | -        | -       | - | -                                                                                                                                          | - | IPR029242 (PFAM); CYTOPLASMIC_DOMAIN (PHOBIUS); TRANSMEMBRANE (PHOBIUS); NON_CYTOPLASMIC_DOMAIN (PHOBIUS); TMhelix (TMHMM)                                                                     |
| <b>g19.t<br/>1</b> | lysophosphatidic acid receptor 6, P2RY6-like GPCR                         | 404 | 2,60E-54 | 57,85 % | 4 | C:plasma membrane; C:integral component of membrane; F:G-protein coupled receptor activity; P:G-protein coupled receptor signaling pathway | - | <b>IPR023242 (PRINTS); IPR000276 (PFAM); IPR022533 (PFAM); G3DSA:1.20.1070.10 (GENE3D); PTHR24232 (PANTHER); IPR000276 (PROSITE_PATTERNS); TRANSMEMBRANE (PHOBIUS); NON_CYTOPLASMIC_DOMAIN</b> |

|                          |                                                     |    |          |            |   |                       |   |                                                                                                                                                                                                                                                                                                                                                                                                                                                                                                                                          |
|--------------------------|-----------------------------------------------------|----|----------|------------|---|-----------------------|---|------------------------------------------------------------------------------------------------------------------------------------------------------------------------------------------------------------------------------------------------------------------------------------------------------------------------------------------------------------------------------------------------------------------------------------------------------------------------------------------------------------------------------------------|
|                          |                                                     |    |          |            |   |                       |   | (PHOBIUS); TRANSMEMBRANE (PHOBIUS); CYTOPLASMIC_DOMAIN (PHOBIUS); NON_CYTOPLASMIC_DOMAIN (PHOBIUS); CYTOPLASMIC_DOMAIN (PHOBIUS); TRANSMEMBRANE (PHOBIUS); TRANSMEMBRANE (PHOBIUS); TRANSMEMBRANE (PHOBIUS); TRANSMEMBRANE (PHOBIUS); CYTOPLASMIC_DOMAIN (PHOBIUS); NON_CYTOPLASMIC_DOMAIN (PHOBIUS); TRANSMEMBRANE (PHOBIUS); NON_CYTOPLASMIC_DOMAIN (PHOBIUS); CYTOPLASMIC_DOMAIN (PHOBIUS); IPR017452 (PROSITE_PROFILES); SSF81321 (SUPERFAMILY); TMhelix (TMHMM); TMhelix (TMHMM); TMhelix (TMHMM); TMhelix (TMHMM); TMhelix (TMHMM) |
| <b>g20.t</b><br><b>1</b> | ef-hand calcium-binding domain-containing protein 2 | 82 | 5,50E-26 | 85,10<br>% | 1 | F:calcium ion binding | - | IPR011992 (G3DSA:1.10.238.GENE3D); IPR011992 (PFAM); PTHR23050                                                                                                                                                                                                                                                                                                                                                                                                                                                                           |

|                          |                                                            |     |              |            |    |                                                                                                                                                                                                                                       |  |                                                                                                                                                                                                                                                                                            |
|--------------------------|------------------------------------------------------------|-----|--------------|------------|----|---------------------------------------------------------------------------------------------------------------------------------------------------------------------------------------------------------------------------------------|--|--------------------------------------------------------------------------------------------------------------------------------------------------------------------------------------------------------------------------------------------------------------------------------------------|
|                          |                                                            |     |              |            |    |                                                                                                                                                                                                                                       |  | (PANTHER); IPR002048 (PROSITE_PROFILES); SSF47473 (SUPERFAMILY)                                                                                                                                                                                                                            |
| <b>g21.t</b><br><b>1</b> | ---NA---                                                   | 70  | -            | -          | -  |                                                                                                                                                                                                                                       |  | SIGNAL_PEPTIDE_N_REGION (PHOBIUS); SIGNAL_PEPTIDE_H_REGION (PHOBIUS); NON_CYTOPLASMIC_DOMAIN (PHOBIUS); SIGNAL_PEPTIDE (PHOBIUS); SIGNAL_PEPTIDE_C_REGION (PHOBIUS); SignalP-noTM (SIGNALP_EUK); SignalP-noTM (SIGNALP_GRAM_NEGATIVE); SignalP-TM (SIGNALP_GRAM_POSITIVE); TMhelix (TMHMM) |
| <b>g22.t</b><br><b>1</b> | coiled-coil domain-containing protein<br>160               | 326 | 7,20E-17     | 47,40<br>% | 10 | C:nucleoplasm; C:nucleolus; F:zinc ion binding; F:tubulin binding; F:histone binding; F:histone deacetylase binding; F:ribonucleoprotein complex binding; F:poly(A) RNA binding; F:phosphoprotein binding; F:scaffold protein binding |  | Coil (COILS); Coil (COILS); Coil (COILS); Coil (COILS)                                                                                                                                                                                                                                     |
| <b>g23.t</b><br><b>1</b> | low quality protein:<br>wd repeat-containing protein<br>78 | 665 | 0,00E+0<br>0 | 59,65<br>% | 1  | P:hematopoietic progenitor cell differentiation                                                                                                                                                                                       |  | IPR001680 (SMART); IPR015943 (G3DSA:2.130.10.GENE3D); IPR001680 (PFAM); PTHR12442 (PANTHER); PTHR12442 (PANTHER); PTHR12442:SF12                                                                                                                                                           |

|                          |                                             |     |          |         |    |                                                                                                                                                                                                                                                                                                                                                                                                                                                                                                                                                                                                                                                                                                                                                                                                    |                                                                                                                                                                                                                                                                                                                                                                                                                                                                                                                                                        |
|--------------------------|---------------------------------------------|-----|----------|---------|----|----------------------------------------------------------------------------------------------------------------------------------------------------------------------------------------------------------------------------------------------------------------------------------------------------------------------------------------------------------------------------------------------------------------------------------------------------------------------------------------------------------------------------------------------------------------------------------------------------------------------------------------------------------------------------------------------------------------------------------------------------------------------------------------------------|--------------------------------------------------------------------------------------------------------------------------------------------------------------------------------------------------------------------------------------------------------------------------------------------------------------------------------------------------------------------------------------------------------------------------------------------------------------------------------------------------------------------------------------------------------|
|                          |                                             |     |          |         |    |                                                                                                                                                                                                                                                                                                                                                                                                                                                                                                                                                                                                                                                                                                                                                                                                    | (PANTHER); PTHR12442:SF12 (PANTHER); IPR001680 (PROSITE_PROFILES); IPR017986 (PROSITE_PROFILES); IPR017986 (SUPERFAMILY)                                                                                                                                                                                                                                                                                                                                                                                                                               |
| <b>g24.t</b><br><b>1</b> | growth hormone secretagogue receptor type 1 | 260 | 4,60E-54 | 67,65 % | 21 | C:cell surface; C:integral component of membrane; C:neuron projection; C:membrane raft; F:growth hormone secretagogue receptor activity; F:growth hormone-releasing hormone receptor activity; P:G-protein coupled receptor signaling pathway; P:actin polymerization or depolymerization; P:adult feeding behavior; P:hormone-mediated signaling pathway; P:growth hormone secretion; P:response to food; P:positive regulation of appetite; P:negative regulation of interleukin-1 beta production; P:cellular response to insulin stimulus; P:positive regulation of multicellular organism growth; P:negative regulation of tumor necrosis factor biosynthetic process; P:positive regulation of insulin-like growth factor receptor signaling pathway; P:negative regulation of interleukin-6 | IPR000276 (PRINTS); IPR000276 (PFAM); G3DSA:1.20.1070.10 (GENE3D); PTHR24243 (PANTHER); PTHR24243:SF3 (PANTHER); TRANSMEMBRANE (PHOBIUS); CYTOPLASMIC_DOMAIN (PHOBIUS); SIGNAL_PEPTIDE_C_REGION (PHOBIUS); NON_CYTOPLASMIC_DOMAIN (PHOBIUS); TRANSMEMBRANE (PHOBIUS); CYTOPLASMIC_DOMAIN (PHOBIUS); SIGNAL_PEPTIDE (PHOBIUS); SIGNAL_PEPTIDE_H_REGION (PHOBIUS); TRANSMEMBRANE (PHOBIUS); NON_CYTOPLASMIC_DOMAIN (PHOBIUS); SIGNAL_PEPTIDE_N_REGION (PHOBIUS); IPR017452 (PROSITE_PROFILES); SSF81321 (SUPERFAMILY); TMhelix (TMHMM); TMhelix (TMHMM); |





|                    |                                                         |     |               |            |   |                                                                                                                                                                                            |             |                                                                                                                                                                                                                                                                                                  |
|--------------------|---------------------------------------------------------|-----|---------------|------------|---|--------------------------------------------------------------------------------------------------------------------------------------------------------------------------------------------|-------------|--------------------------------------------------------------------------------------------------------------------------------------------------------------------------------------------------------------------------------------------------------------------------------------------------|
|                    |                                                         |     |               |            |   |                                                                                                                                                                                            |             | (SUPERFAMILY); IPR003961<br>(SUPERFAMILY); IPR003961<br>(SUPERFAMILY); TMhelix<br>(TMHMM); TMhelix (TMHMM)                                                                                                                                                                                       |
| <b>g26.t<br/>1</b> | ---NA---                                                | 438 | -             | -          | - | -                                                                                                                                                                                          | -           | no IPS match                                                                                                                                                                                                                                                                                     |
| <b>g27.t<br/>1</b> | fibronectin type iii<br>domain-containing<br>protein 3b | 94  | 4,80E-08      | 70,71<br>% | - | -                                                                                                                                                                                          | -           | PTHR19900 (PANTHER);<br>PTHR19900:SF54 (PANTHER)                                                                                                                                                                                                                                                 |
| <b>g28.t<br/>1</b> | ---NA---                                                | 201 | -             | -          | - | -                                                                                                                                                                                          | -           | TRANSMEMBRANE (PHOBIUS);<br>NON_CYTOPLASMIC_DOMAIN<br>(PHOBIUS);<br>CYTOPLASMIC_DOMAIN<br>(PHOBIUS);<br>NON_CYTOPLASMIC_DOMAIN<br>(PHOBIUS);<br>CYTOPLASMIC_DOMAIN<br>(PHOBIUS); TRANSMEMBRANE<br>(PHOBIUS); TRANSMEMBRANE<br>(PHOBIUS); TMhelix (TMHMM);<br>TMhelix (TMHMM); TMhelix<br>(TMHMM) |
| <b>g29.t<br/>1</b> | ---NA---                                                | 423 | -             | -          | - | -                                                                                                                                                                                          | -           | no IPS match                                                                                                                                                                                                                                                                                     |
| <b>g30.t<br/>1</b> | glycerol kinase 5                                       | 532 | 9,10E-<br>175 | 64,60<br>% | 6 | C:mitochondrion; F:glycerol kinase<br>activity; P:glycerol metabolic<br>process; P:triglyceride metabolic<br>process; P:phosphorylation;<br>P:glycerol-3-phosphate<br>biosynthetic process | EC:2.7.1.30 | G3DSA:3.30.420.40 (GENE3D);<br>IPR018485 (PFAM);<br>G3DSA:3.30.420.40 (GENE3D);<br>IPR018484 (PFAM);<br>PTHR10196:SF54 (PANTHER);<br>PTHR10196 (PANTHER);                                                                                                                                        |

|                    |                                                     |            |                       |                    |           |                                                                                                                                                                                                                                                                                                                                                                                                                                                                                                                                                                  |   |                                                                                                                                                                                                                                     |
|--------------------|-----------------------------------------------------|------------|-----------------------|--------------------|-----------|------------------------------------------------------------------------------------------------------------------------------------------------------------------------------------------------------------------------------------------------------------------------------------------------------------------------------------------------------------------------------------------------------------------------------------------------------------------------------------------------------------------------------------------------------------------|---|-------------------------------------------------------------------------------------------------------------------------------------------------------------------------------------------------------------------------------------|
|                    |                                                     |            |                       |                    |           |                                                                                                                                                                                                                                                                                                                                                                                                                                                                                                                                                                  |   | PTHR10196 (PANTHER);<br>PTHR10196:SF54 (PANTHER);<br>SSF53067 (SUPERFAMILY);<br>SSF53067 (SUPERFAMILY)                                                                                                                              |
| <b>g31.t<br/>1</b> | zinc finger b-box<br>domain-containing<br>protein 1 | 236        | 1,70E-14              | 42,65<br>%         | 2         | C:intracellular; F:zinc ion binding                                                                                                                                                                                                                                                                                                                                                                                                                                                                                                                              | - | Coil (COILS)                                                                                                                                                                                                                        |
| <b>g32.t<br/>1</b> | <b>HSP47/SERPINH1</b>                               | <b>470</b> | <b>1,60E-<br/>105</b> | <b>68,05<br/>%</b> | <b>14</b> | <b>C:collagen trimer; C:extracellular<br/>space; C:endoplasmic reticulum;<br/>C:endoplasmic reticulum-Golgi<br/>intermediate compartment;<br/>C:extracellular exosome; F:serine-<br/>type endopeptidase inhibitor<br/>activity; F:collagen binding;<br/>F:poly(A) RNA binding; F:unfolded<br/>protein binding; P:chondrocyte<br/>development involved in<br/>endochondral bone<br/>morphogenesis; P:negative<br/>regulation of endopeptidase<br/>activity; P:collagen fibril<br/>organization; P:collagen<br/>biosynthetic process; P:protein<br/>maturation</b> | - | <b>IPR023796 (SMART);<br/>G3DSA:3.30.497.10 (GENE3D);<br/>G3DSA:2.30.39.10 (GENE3D);<br/>IPR023796 (PFAM); IPR000215<br/>(PANTHER); PTHR11461:SF27<br/>(PANTHER); IPR023795<br/>(PROSITE_PATTERNS); IPR023796<br/>(SUPERFAMILY)</b> |
| <b>g33.t<br/>1</b> | lysosome-associated<br>membrane<br>glycoprotein 1   | 380        | 3,30E-32              | 40,05<br>%         | 24        | C:multivesicular body; C:integral<br>component of plasma membrane;<br>C:external side of plasma<br>membrane; C:dendrite; C:platelet<br>dense granule membrane; C:late<br>endosome membrane;                                                                                                                                                                                                                                                                                                                                                                      | - | IPR002000 (PFAM); IPR002000<br>(PANTHER);<br>NON_CYTOPLASMIC_DOMAIN<br>(PHOBIUS);<br>CYTOPLASMIC_DOMAIN<br>(PHOBIUS); TRANSMEMBRANE                                                                                                 |

|                          |                                          |     |          |         |   |                                                                                                                                                                                                                                                                                                                                                                                                                                                                                                                                                  |   |                                                                                                                                                                                   |
|--------------------------|------------------------------------------|-----|----------|---------|---|--------------------------------------------------------------------------------------------------------------------------------------------------------------------------------------------------------------------------------------------------------------------------------------------------------------------------------------------------------------------------------------------------------------------------------------------------------------------------------------------------------------------------------------------------|---|-----------------------------------------------------------------------------------------------------------------------------------------------------------------------------------|
|                          |                                          |     |          |         |   | C:sarcolemma; C:melanosome; C:neuronal cell body; C:cytolytic granule; C:phagolysosome membrane; C:extracellular exosome; C:alveolar lamellar body; F:enzyme binding; F:protein domain specific binding; P:autophagy; P:granzyme-mediated apoptotic signaling pathway; P:viral process; P:positive regulation of natural killer cell degranulation; P:autophagic cell death; P:protein stabilization; P:establishment of protein localization to organelle; P:Golgi to lysosome transport; P:regulation of organelle transport along microtubule |   | (PHOBIUS); TRANSMEMBRANE (PHOBIUS); NON_CYTOPLASMIC_DOMAIN (PHOBIUS); IPR002000 (PROSITE_PROFILES); TMhelix (TMHMM); TMhelix (TMHMM)                                              |
| <b>g34.t</b><br><b>1</b> | haus augmin-like complex subunit partial | 355 | 8,10E-08 | 63,10 % | 4 | C:centrosome; C:HAUS complex; P:spindle assembly; P:centrosome organization                                                                                                                                                                                                                                                                                                                                                                                                                                                                      | - | Coil (COILS); SIGNAL_PEPTIDE (PHOBIUS); SIGNAL_PEPTIDE_H_REGION (PHOBIUS); SIGNAL_PEPTIDE_N_REGION (PHOBIUS); NON_CYTOPLASMIC_DOMAIN (PHOBIUS); SIGNAL_PEPTIDE_C_REGION (PHOBIUS) |
| <b>g35.t</b><br><b>1</b> | ---NA---                                 | 225 | -        | -       | - | -                                                                                                                                                                                                                                                                                                                                                                                                                                                                                                                                                | - | no IPS match                                                                                                                                                                      |
| <b>g36.t</b>             | adp-ribosylation                         | 208 | 3,10E-53 | 67,15   | 3 | C:intracellular; F:GTP binding;                                                                                                                                                                                                                                                                                                                                                                                                                                                                                                                  | - | IPR006689 (PRINTS); IPR024156                                                                                                                                                     |

|                    |                                          |     |              |            |   |                                                                                                                                                          |   |                                                                                                                                                                                                                                                                                                                                                                                                                                                              |
|--------------------|------------------------------------------|-----|--------------|------------|---|----------------------------------------------------------------------------------------------------------------------------------------------------------|---|--------------------------------------------------------------------------------------------------------------------------------------------------------------------------------------------------------------------------------------------------------------------------------------------------------------------------------------------------------------------------------------------------------------------------------------------------------------|
| <b>1</b>           | factor                                   |     |              | %          |   | P:small GTPase mediated signal transduction                                                                                                              |   | (SMART); IPR003579 (SMART); IPR006687 (SMART); IPR027417 (G3DSA:3.40.50.GENE3D); IPR006689 (PFAM); IPR005225 (TIGRFAM); PTHR11711 (PANTHER); IPR024156 (PROSITE_PROFILES); IPR027417 (SUPERFAMILY)                                                                                                                                                                                                                                                           |
| <b>g37.t<br/>1</b> | rcc1 and btb domain-containing protein 1 | 531 | 0,00E+0<br>0 | 83,15<br>% | 1 | C:cytoplasm                                                                                                                                              | - | IPR000408 (PRINTS); IPR000210 (SMART); IPR009091 (G3DSA:2.130.10.GENE3D); IPR000210 (PFAM); IPR000408 (PFAM); G3DSA:3.30.710.10 (GENE3D); PTHR22870:SF133 (PANTHER); PTHR22870 (PANTHER); IPR000408 (PROSITE_PATTERNS); IPR000408 (PROSITE_PROFILES); IPR000408 (PROSITE_PROFILES); IPR000408 (PROSITE_PROFILES); IPR000210 (PROSITE_PROFILES); IPR000408 (PROSITE_PROFILES); IPR000408 (PROSITE_PROFILES); IPR009091 (SUPERFAMILY); IPR011333 (SUPERFAMILY) |
| <b>g38.t<br/>1</b> | neuroligin-3 isoform x4                  | 656 | 0,00E+0<br>0 | 66,25<br>% | 6 | C:integral component of plasma membrane; C:synapse; F:neurexin family protein binding; P:cell adhesion; P:regulation of synaptic transmission; P:synapse | - | IPR000460 (PRINTS); IPR029058 (G3DSA:3.40.50.GENE3D); IPR002018 (PFAM); IPR030025 (PTHR11559:PANTHER); IPR030025 (PTHR11559:PANTHER);                                                                                                                                                                                                                                                                                                                        |

|                    |                               |     |          |            |    |                                                                                                                                                                                                                                                                                                                                                                                                                                                                                                                                                                                                                                                                                                                                                                                                                                           |            |                                                                                                                                                                          |
|--------------------|-------------------------------|-----|----------|------------|----|-------------------------------------------------------------------------------------------------------------------------------------------------------------------------------------------------------------------------------------------------------------------------------------------------------------------------------------------------------------------------------------------------------------------------------------------------------------------------------------------------------------------------------------------------------------------------------------------------------------------------------------------------------------------------------------------------------------------------------------------------------------------------------------------------------------------------------------------|------------|--------------------------------------------------------------------------------------------------------------------------------------------------------------------------|
|                    |                               |     |          |            |    | organization                                                                                                                                                                                                                                                                                                                                                                                                                                                                                                                                                                                                                                                                                                                                                                                                                              |            | PTHR11559 (PANTHER);<br>NON_CYTOPLASMIC_DOMAIN<br>(PHOBIUS);<br>CYTOPLASMIC_DOMAIN<br>(PHOBIUS); TRANSMEMBRANE<br>(PHOBIUS); IPR029058<br>(SUPERFAMILY); TMhelix (TMHMM) |
| <b>g39.t<br/>1</b> | neuroligin- x-linked-<br>like | 187 | 2,50E-69 | 70,55<br>% | 42 | C:extracellular space; C:integral<br>component of plasma membrane;<br>C:cell surface; C:postsynaptic<br>density; C:cell junction; C:endocytic<br>vesicle; C:postsynaptic membrane;<br>C:excitatory synapse; C:inhibitory<br>synapse; F:receptor activity;<br>F:neurexin family protein binding;<br>F:cell adhesion molecule binding;<br>F:carboxylic ester hydrolase<br>activity; F:scaffold protein binding;<br>P:regulation of respiratory gaseous<br>exchange by neurological system<br>process; P:receptor-mediated<br>endocytosis; P:neuron cell-cell<br>adhesion; P:metabolic process;<br>P:visual learning; P:sensory<br>perception of pain; P:adult<br>behavior; P:positive regulation of<br>synaptic transmission, GABAergic;<br>P:social behavior; P:locomotory<br>exploration behavior; P:axon<br>extension; P:oligodendrocyte | EC:3.1.1.1 | IPR002018 (PFAM); IPR029058<br>(G3DSA:3.40.50.GENE3D);<br>PTHR11559 (PANTHER);<br>PTHR11559 (PANTHER); IPR030025<br>(PTHR11559:PANTHER); IPR029058<br>(SUPERFAMILY)      |

|              |                   |     |          |       |    |                                                                                                                                                                                                                                                                                                                                                                                                                                                                                                                                                                                                                                                                                                                                                                                                                                                                                                                      |            |           |
|--------------|-------------------|-----|----------|-------|----|----------------------------------------------------------------------------------------------------------------------------------------------------------------------------------------------------------------------------------------------------------------------------------------------------------------------------------------------------------------------------------------------------------------------------------------------------------------------------------------------------------------------------------------------------------------------------------------------------------------------------------------------------------------------------------------------------------------------------------------------------------------------------------------------------------------------------------------------------------------------------------------------------------------------|------------|-----------|
|              |                   |     |          |       |    | <p>differentiation; P:neuromuscular process controlling balance; P:positive regulation of synapse assembly; P:positive regulation of synaptic transmission, glutamatergic; P:rhythmic synaptic transmission; P:regulation of dendritic spine morphogenesis; P:vocalization behavior; P:postsynaptic membrane assembly; P:presynaptic membrane assembly; P:gephyrin clustering involved in postsynaptic density assembly; P:postsynaptic density protein 95 clustering; P:positive regulation of inhibitory postsynaptic membrane potential; P:regulation of long-term synaptic potentiation; P:regulation of N-methyl-D-aspartate selective glutamate receptor activity; P:regulation of terminal button organization; P:positive regulation of excitatory postsynaptic membrane potential; P:positive regulation of alpha-amino-3-hydroxy-5-methyl-4-isoxazole propionate selective glutamate receptor activity</p> |            |           |
| <b>g40.t</b> | neuroligin-2-like | 164 | 2,50E-57 | 84,95 | 53 | C:extracellular space; C:Golgi                                                                                                                                                                                                                                                                                                                                                                                                                                                                                                                                                                                                                                                                                                                                                                                                                                                                                       | EC:3.1.1.1 | IPR029058 |

|   |            |  |  |   |                                                                                                                                                                                                                                                                                                                                                                                                                                                                                                                                                                                                                                                                                                                                                                                                                                                                                                                                                                                                       |  |                                                                                                                                                                                                                                                                                                                                                                                                                                   |
|---|------------|--|--|---|-------------------------------------------------------------------------------------------------------------------------------------------------------------------------------------------------------------------------------------------------------------------------------------------------------------------------------------------------------------------------------------------------------------------------------------------------------------------------------------------------------------------------------------------------------------------------------------------------------------------------------------------------------------------------------------------------------------------------------------------------------------------------------------------------------------------------------------------------------------------------------------------------------------------------------------------------------------------------------------------------------|--|-----------------------------------------------------------------------------------------------------------------------------------------------------------------------------------------------------------------------------------------------------------------------------------------------------------------------------------------------------------------------------------------------------------------------------------|
| 1 | isoform x5 |  |  | % | <p>apparatus; C:external side of plasma membrane; C:N-methyl-D-aspartate selective glutamate receptor complex; C:cell junction; C:filopodium tip; C:dendritic spine; C:postsynaptic membrane; C:excitatory synapse; C:inhibitory synapse; C:neuronal postsynaptic density; F:receptor activity; F:PDZ domain binding; F:neurexin family protein binding; F:protein dimerization activity; F:cell adhesion molecule binding; F:carboxylic ester hydrolase activity; F:scaffold protein binding; P:regulation of respiratory gaseous exchange by neurological system process; P:protein targeting; P:heterophilic cell-cell adhesion via plasma membrane cell adhesion molecules; P:neuron cell-cell adhesion; P:metabolic process; P:positive regulation of circadian sleep/wake cycle, wakefulness; P:synaptic vesicle targeting; P:calcium-dependent cell-cell adhesion via plasma membrane cell adhesion molecules; P:neuronal signal transduction; P:neuron projection development; P:positive</p> |  | <p>(G3DSA:3.40.50.GENE3D); IPR002018 (PFAM); PTHR11559:SF176 (PANTHER); PTHR11559 (PANTHER); IPR019819 (PROSITE_PATTERNS); SIGNAL_PEPTIDE_C_REGION (PHOBIUS); NON_CYTOPLASMIC_DOMAIN (PHOBIUS); SIGNAL_PEPTIDE (PHOBIUS); SIGNAL_PEPTIDE_H_REGION (PHOBIUS); SIGNAL_PEPTIDE_N_REGION (PHOBIUS); SignalP-TM (SIGNALP_GRAM_POSITIVE); SignalP-noTM (SIGNALP_GRAM_NEGATIVE); SignalP-noTM (SIGNALP_EUK); IPR029058 (SUPERFAMILY)</p> |
|---|------------|--|--|---|-------------------------------------------------------------------------------------------------------------------------------------------------------------------------------------------------------------------------------------------------------------------------------------------------------------------------------------------------------------------------------------------------------------------------------------------------------------------------------------------------------------------------------------------------------------------------------------------------------------------------------------------------------------------------------------------------------------------------------------------------------------------------------------------------------------------------------------------------------------------------------------------------------------------------------------------------------------------------------------------------------|--|-----------------------------------------------------------------------------------------------------------------------------------------------------------------------------------------------------------------------------------------------------------------------------------------------------------------------------------------------------------------------------------------------------------------------------------|

|  |  |  |  |  |                                                                                                                                                                                                                                                                                                                                                                                                                                                                                                                                                                                                                                                                                                                                                                                                                                                                                                                                                                                                              |  |  |
|--|--|--|--|--|--------------------------------------------------------------------------------------------------------------------------------------------------------------------------------------------------------------------------------------------------------------------------------------------------------------------------------------------------------------------------------------------------------------------------------------------------------------------------------------------------------------------------------------------------------------------------------------------------------------------------------------------------------------------------------------------------------------------------------------------------------------------------------------------------------------------------------------------------------------------------------------------------------------------------------------------------------------------------------------------------------------|--|--|
|  |  |  |  |  | regulation of synaptic transmission, GABAergic; P:rhythmic process; P:cytoskeletal matrix organization at active zone; P:protein homooligomerization; P:protein heterotetramerization; P:positive regulation of filopodium assembly; P:positive regulation of synapse assembly; P:positive regulation of synaptic transmission, glutamatergic; P:positive regulation of dendritic spine development; P:negative regulation of dendritic spine morphogenesis; P:terminal button organization; P:synaptic vesicle clustering; P:postsynaptic membrane assembly; P:alpha-amino-3-hydroxy-5-methyl-4-isoxazole propionate selective glutamate receptor clustering; P:N-methyl-D-aspartate receptor clustering; P:neurexin clustering involved in presynaptic membrane assembly; P:postsynaptic density protein 95 clustering; P:receptor localization to synapse; P:positive regulation of ruffle assembly; P:positive regulation of synaptic vesicle endocytosis; P:positive regulation of intracellular signal |  |  |
|--|--|--|--|--|--------------------------------------------------------------------------------------------------------------------------------------------------------------------------------------------------------------------------------------------------------------------------------------------------------------------------------------------------------------------------------------------------------------------------------------------------------------------------------------------------------------------------------------------------------------------------------------------------------------------------------------------------------------------------------------------------------------------------------------------------------------------------------------------------------------------------------------------------------------------------------------------------------------------------------------------------------------------------------------------------------------|--|--|



|                    |                                 |          |           |         |    |                                                                                                                                                                                                                                                                                                                                  |   |                                                                                                                                                                                                   |
|--------------------|---------------------------------|----------|-----------|---------|----|----------------------------------------------------------------------------------------------------------------------------------------------------------------------------------------------------------------------------------------------------------------------------------------------------------------------------------|---|---------------------------------------------------------------------------------------------------------------------------------------------------------------------------------------------------|
|                    |                                 |          |           |         |    | transduction; P:positive regulation of synaptic vesicle exocytosis; P:regulation of N-methyl-D-aspartate selective glutamate receptor activity; P:regulation of alpha-amino-3-hydroxy-5-methyl-4-isoxazole propionate selective glutamate receptor activity; P:positive regulation of excitatory postsynaptic membrane potential |   |                                                                                                                                                                                                   |
| <b>g41.t<br/>1</b> | ---NA---                        | 96       | -         | -       |    | -                                                                                                                                                                                                                                                                                                                                | - | no IPS match                                                                                                                                                                                      |
| <b>g42.t<br/>1</b> | protein ect2 isoform x1         | 368      | 1,40E-35  | 55,80 % | 9  | C:nucleus; C:cytoplasm; F:Rho guanyl-nucleotide exchange factor activity; F:GTPase activator activity; P:cell morphogenesis; P:cytokinesis; P:intracellular signal transduction; P:positive regulation of GTPase activity; P:positive regulation of neuron differentiation                                                       | - | Coil (COILS); IPR026817 (PANTHER)                                                                                                                                                                 |
| <b>g43.t<br/>1</b> | hypothetical protein H310_04227 | 72       | 7,30E-04  | 61%     |    | -                                                                                                                                                                                                                                                                                                                                | - | no IPS match                                                                                                                                                                                      |
| <b>g44.t<br/>1</b> | protein ect2 isoform x1         | 100<br>2 | 5,30E-101 | 73,35 % | 27 | C:cytoplasm; C:bicellular tight junction; C:midbody; C:nuclear membrane; C:cleavage furrow; C:centralspindlin complex; F:signal transducer activity; F:Rho guanyl-nucleotide exchange factor activity; F:GTPase activator activity; F:Rho GTPase binding; F:protein                                                              | - | IPR001357 (SMART); IPR000219 (SMART); IPR001357 (G3DSA:3.40.50.GENE3D); IPR000219 (G3DSA:1.20.900.GENE3D); IPR000219 (PFAM); IPR001357 (PFAM); IPR026817 (PANTHER); IPR001331 (PROSITE_PATTERNS); |

|                    |                                        |     |          |            |   |                                                                                                                                                                                                                                                                                                                                                                                                                                                                                                                                                                                                                                                                                                                       |   |                                                                                                                                                                                                                                       |
|--------------------|----------------------------------------|-----|----------|------------|---|-----------------------------------------------------------------------------------------------------------------------------------------------------------------------------------------------------------------------------------------------------------------------------------------------------------------------------------------------------------------------------------------------------------------------------------------------------------------------------------------------------------------------------------------------------------------------------------------------------------------------------------------------------------------------------------------------------------------------|---|---------------------------------------------------------------------------------------------------------------------------------------------------------------------------------------------------------------------------------------|
|                    |                                        |     |          |            |   | <p>homodimerization activity; P:cell morphogenesis; P:cytokinesis; P:activation of protein kinase activity; P:positive regulation of cytokinesis; P:intracellular signal transduction; P:positive regulation of protein import into nucleus; P:positive regulation of apoptotic process; P:positive regulation of I-kappaB kinase/NF-kappaB signaling; P:positive regulation of GTPase activity; P:positive regulation of neuron differentiation; P:protein homooligomerization; P:regulation of attachment of spindle microtubules to kinetochore; P:cellular response to hydrogen peroxide; P:bicellular tight junction assembly; P:cellular response to calcium ion; P:cellular response to ionizing radiation</p> |   | <p>TRANSMEMBRANE (PHOBIUS); NON_CYTOPLASMIC_DOMAIN (PHOBIUS); CYTOPLASMIC_DOMAIN (PHOBIUS); IPR001357 (PROSITE_PROFILES); IPR000219 (PROSITE_PROFILES); IPR001357 (SUPERFAMILY); IPR000219 (SUPERFAMILY); IPR001357 (SUPERFAMILY)</p> |
| <b>g45.t<br/>1</b> | gpalpp motifs-<br>containing protein 1 | 320 | 7,90E-56 | 55,25<br>% | 3 | <p>F:molecular_function;<br/>P:biological_process;<br/>C:cellular_component</p>                                                                                                                                                                                                                                                                                                                                                                                                                                                                                                                                                                                                                                       | - | <p>IPR022226 (PFAM); PTHR15606:SF3 (PANTHER); PTHR15606 (PANTHER)</p>                                                                                                                                                                 |

red - matching to syntenic data in **Fig. 3**
